# Supplementary material for: Recyclable BINOL–quinine–squaramide as a highly efficient organocatalyst for α-amination of 1,3-dicarbonyl compounds and α-cyanoacetates
Source: Royal Society of Chemistry journal article supplement (doi:10.1039/c4ra13789b), 2015-01-01
Supplement: c4ra13789b1.pdf [file c4ra13789b1.pdf]

# **Recyclable BINOL-Quinine-Squaramide as Highly Efficient Organocatalyst for $\alpha$ -Amination of 1, 3- Dicarboxyl Compounds and $\alpha$ -Cyanoacetates**

Yongzhi Gao,<sup>a</sup> Bin Liu,<sup>a</sup> Hai-Bing Zhou,<sup>a,b</sup> Wei Wang,<sup>a</sup> Chune Dong\*<sup>a,b</sup>

<sup>a</sup> *Key Laboratory of Combinatorial Biosynthesis and Drug Discovery (Wuhan University), Ministry of Education, State Key Laboratory of Virology, Wuhan University School of Pharmaceutical Sciences, Wuhan 430071, China.*

<sup>b</sup> *Key Laboratory of Organofluorine Chemistry, Shanghai Institute of Organic Chemistry, Chinese Academy of Sciences, Shanghai, 200032, China.*

*E-mail: cdong@whu.edu.cn; Tel: 86-2768759586; Fax: 86-27-68759850*

## **Content**

**I NMR spectra of 4**

**II HPLC spectra of 4**

# 1H NMR spectra of 4

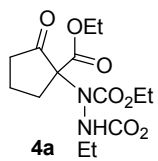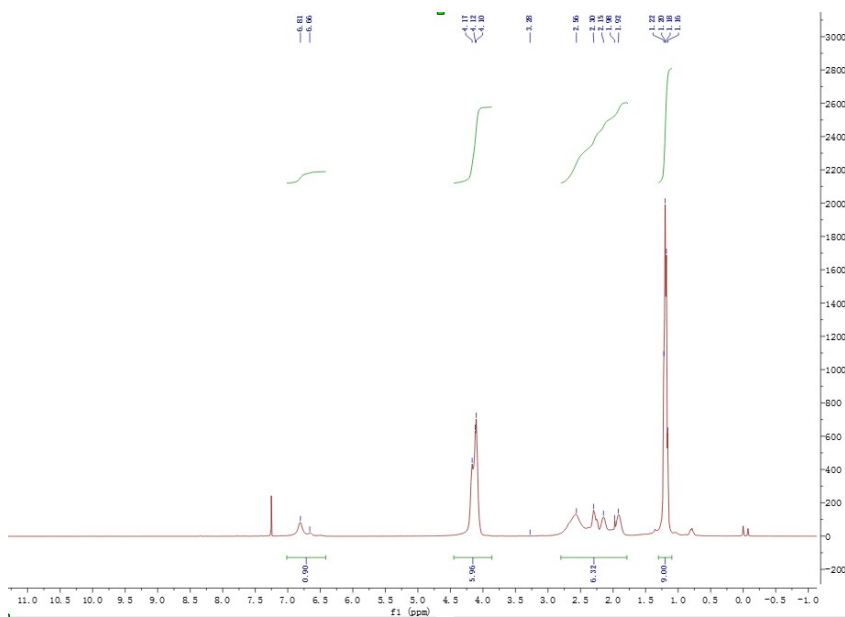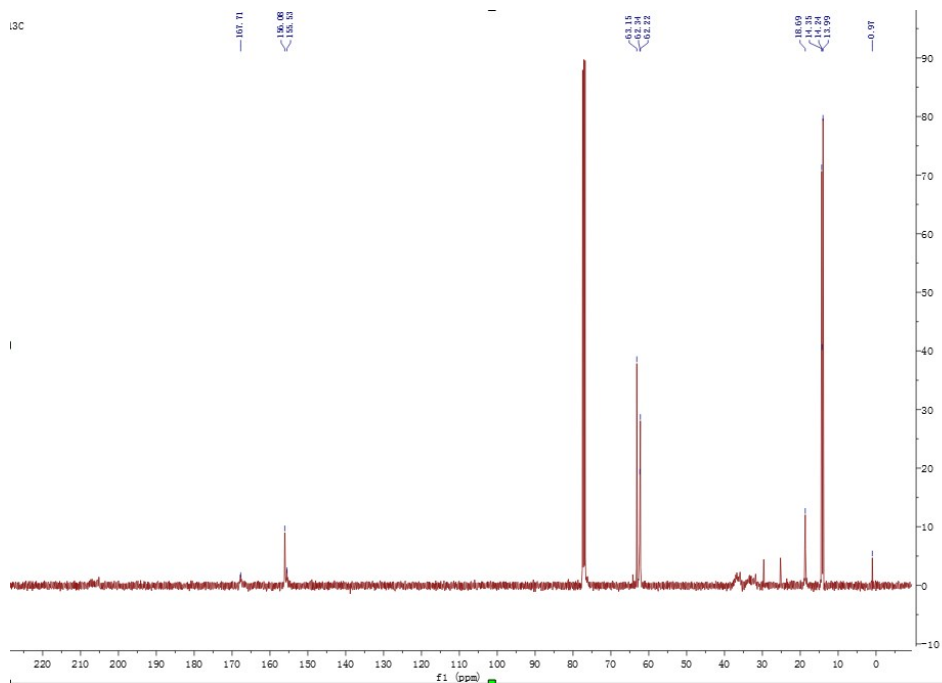

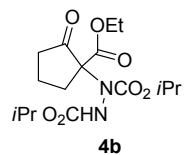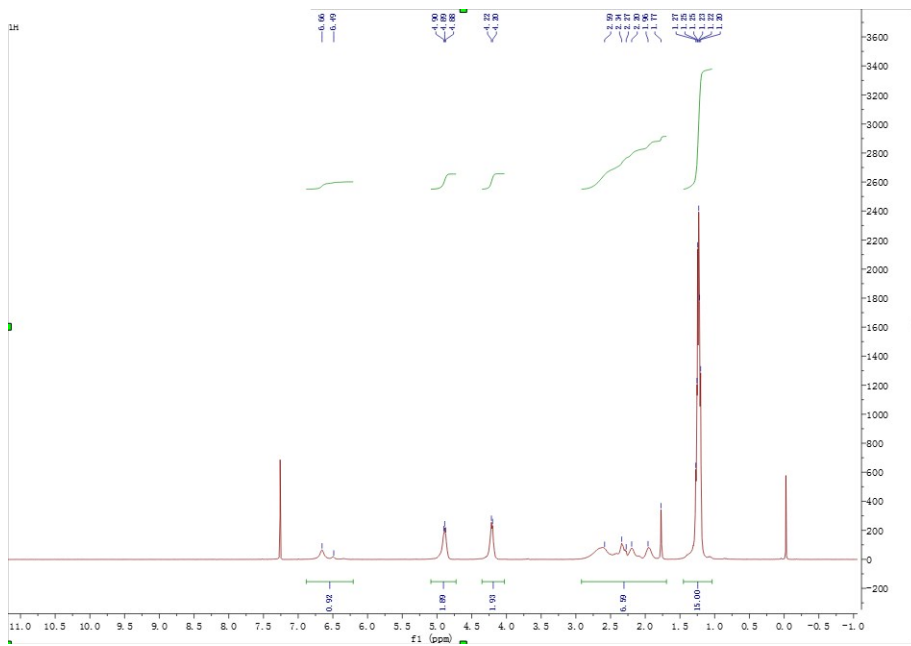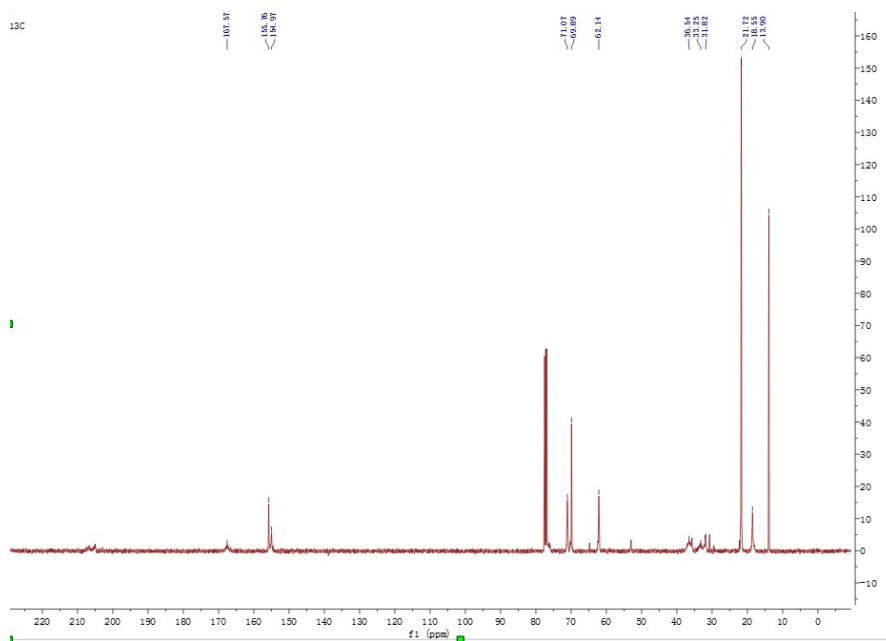

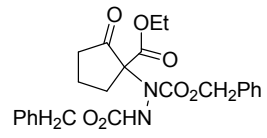

**4c**

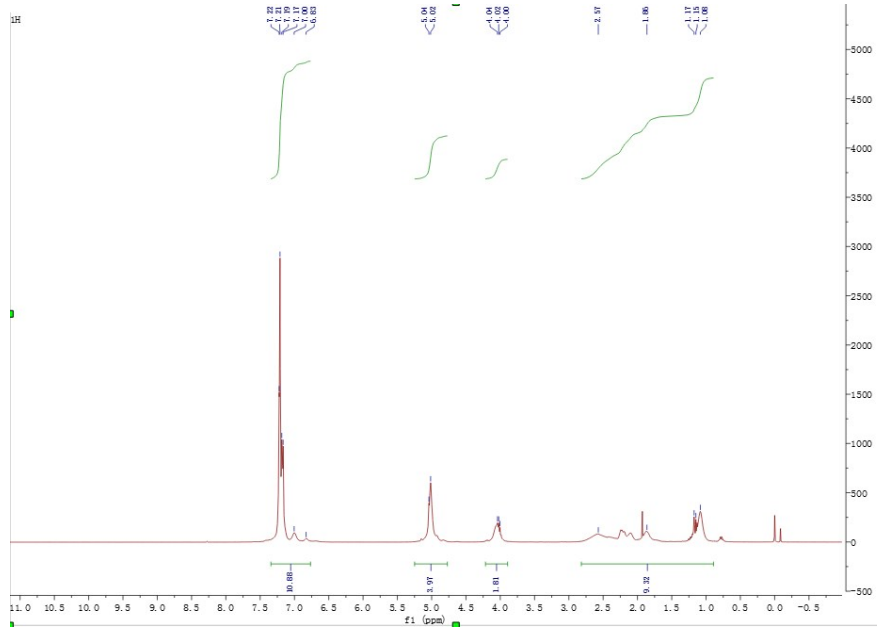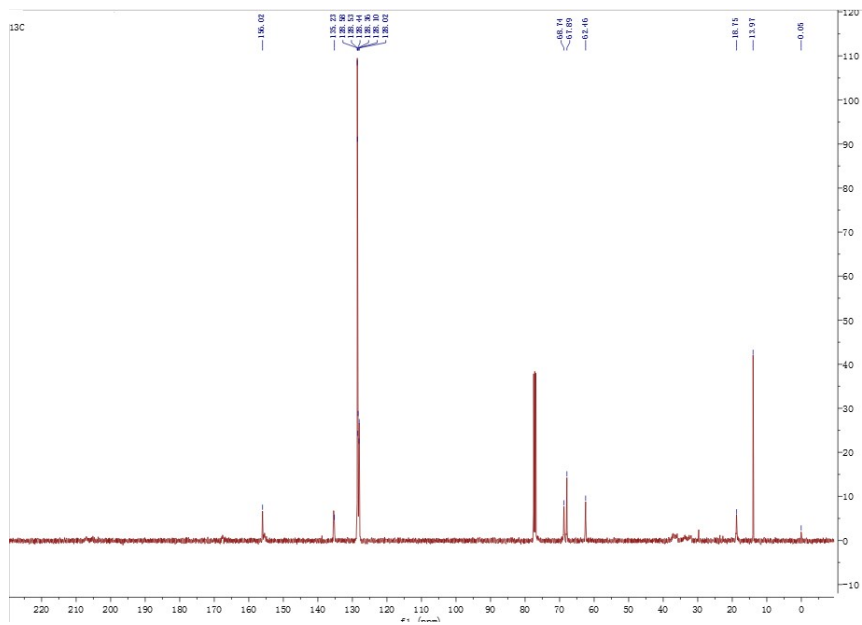

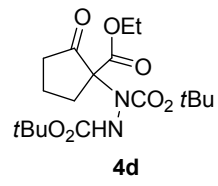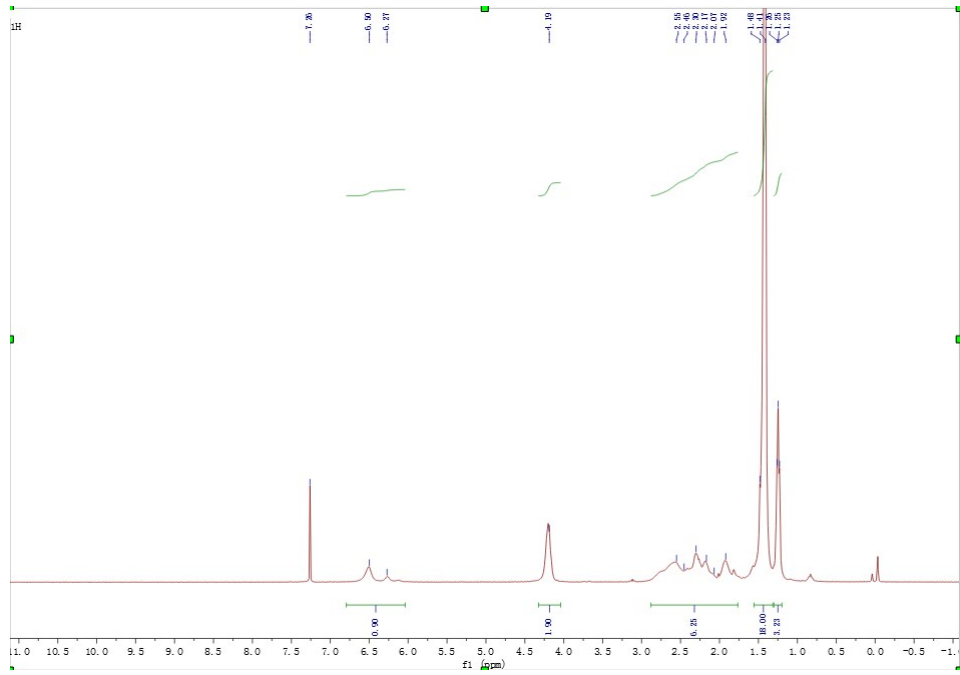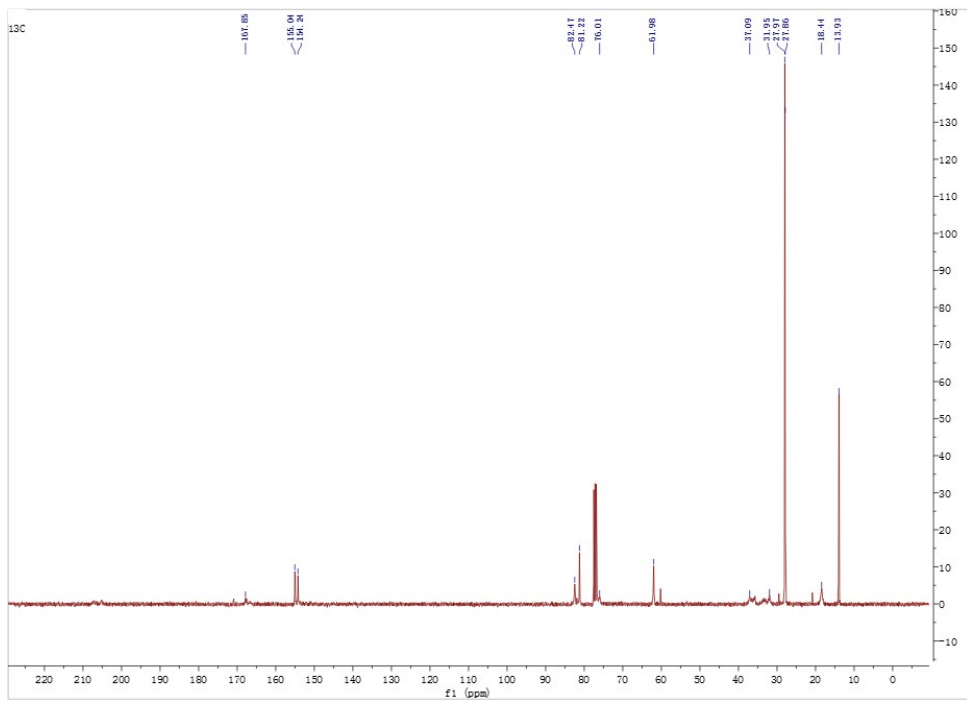

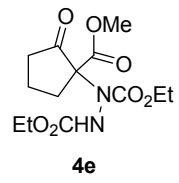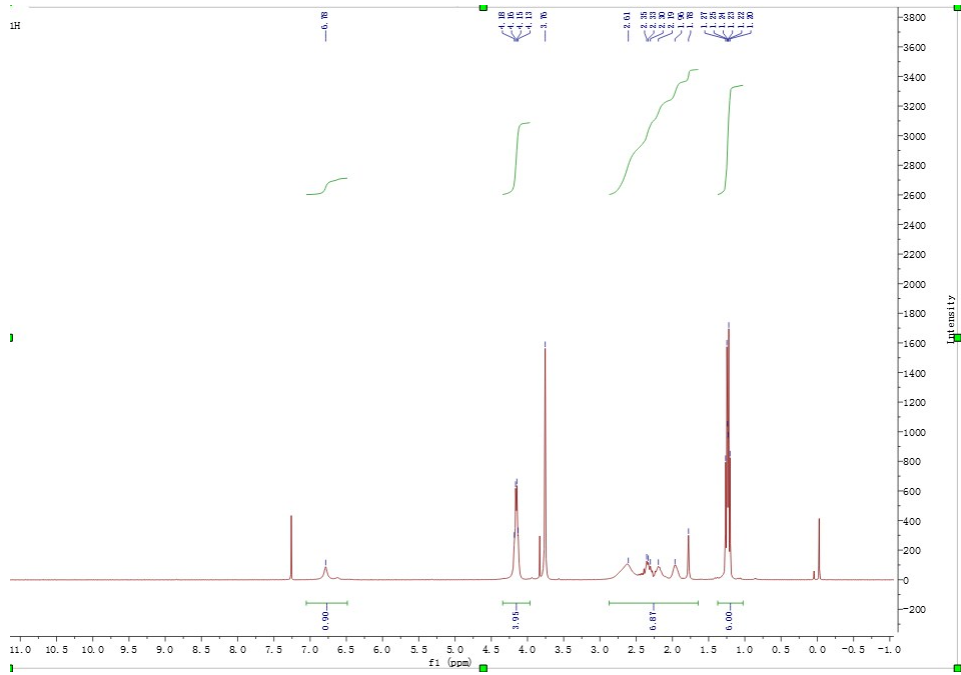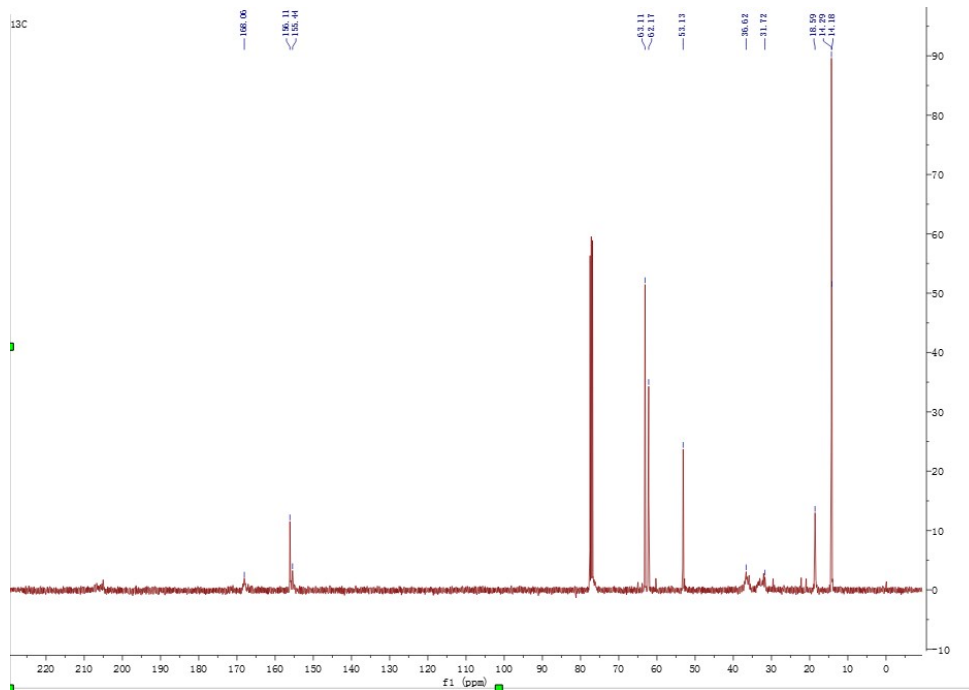

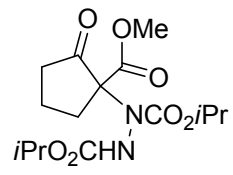

**4f**

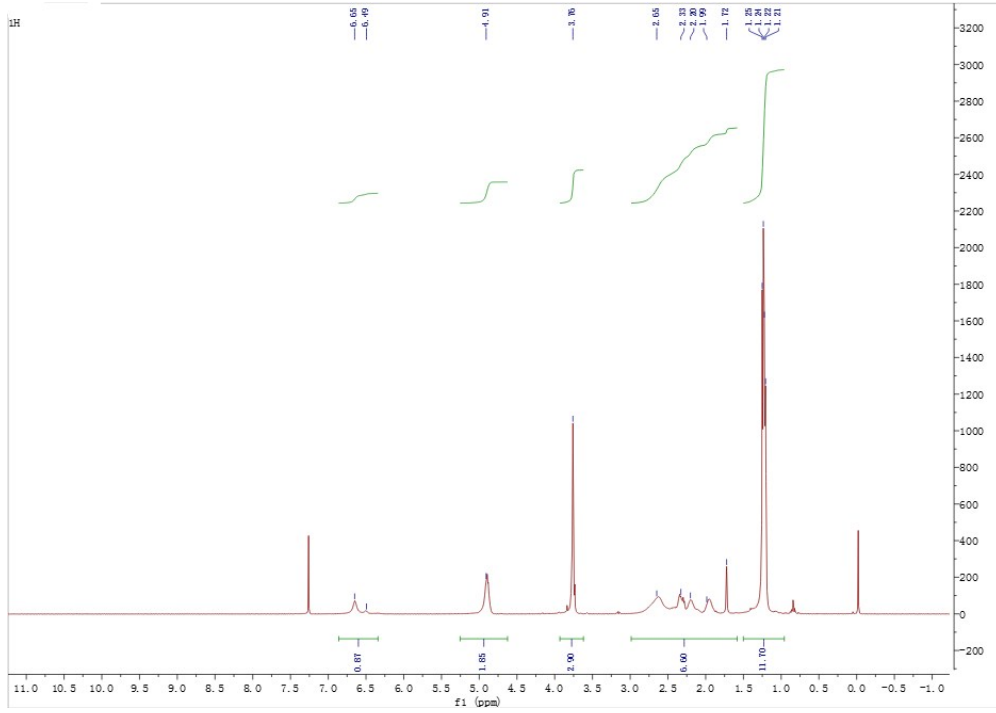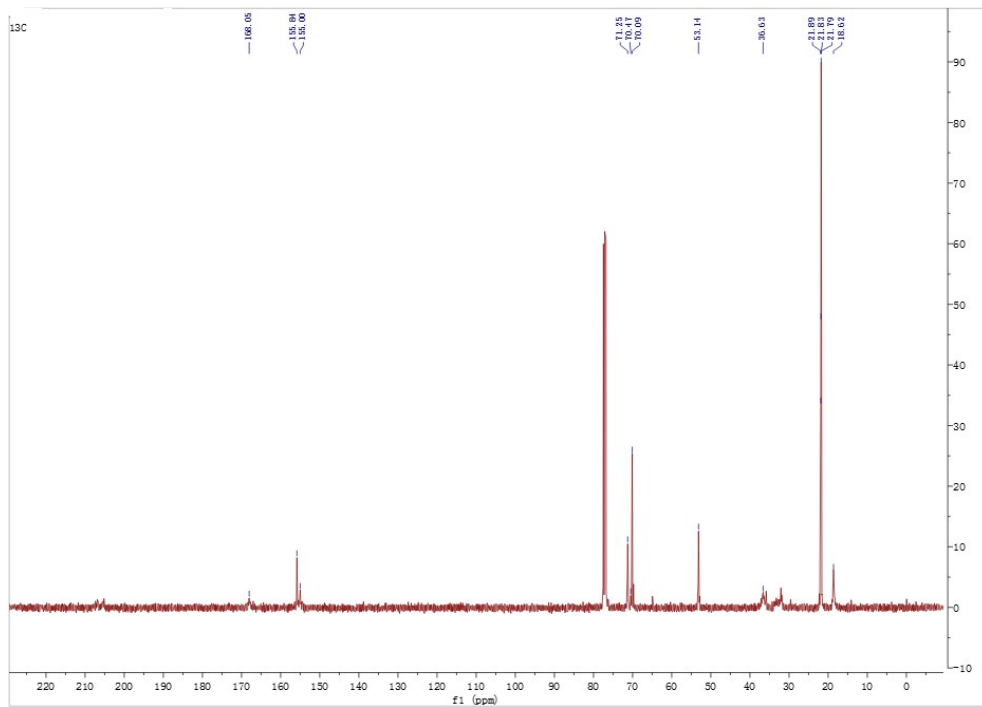

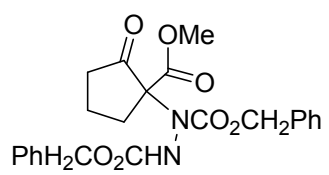

4g

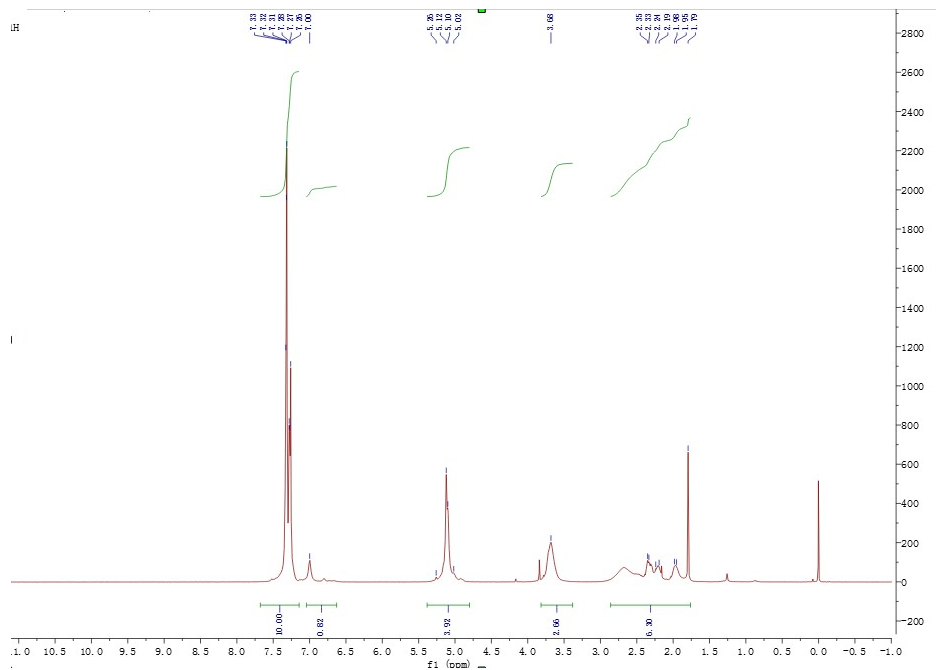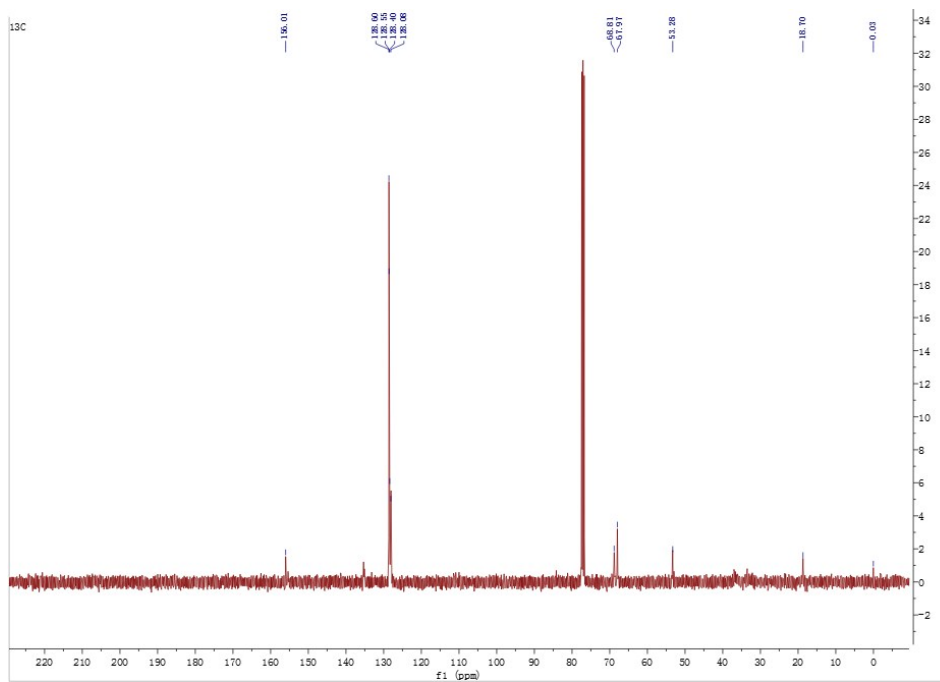



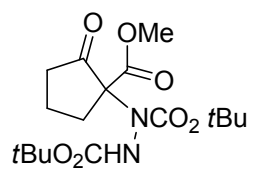

4h

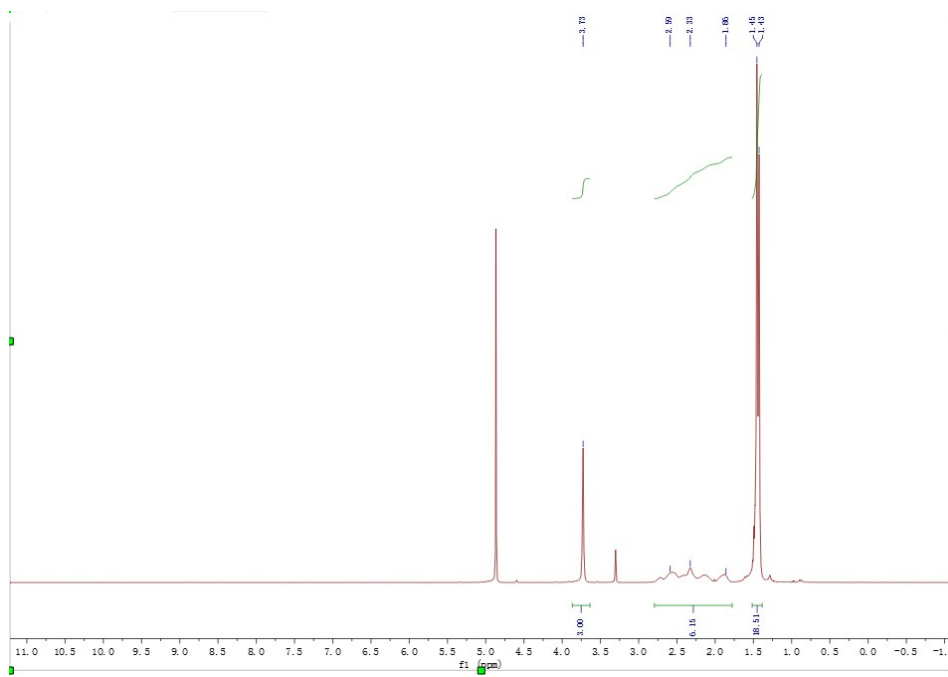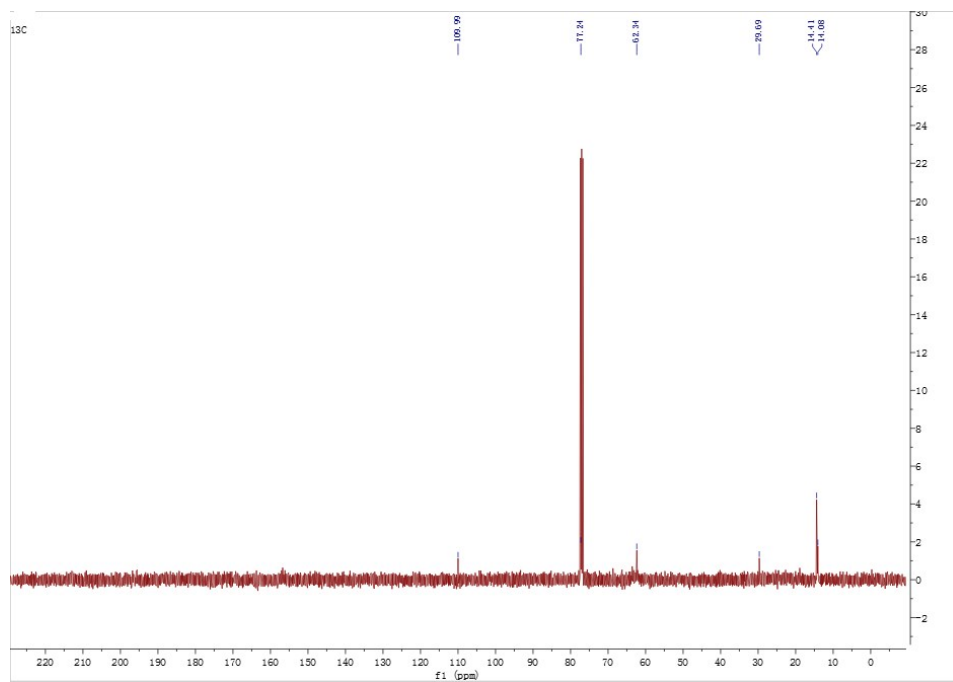

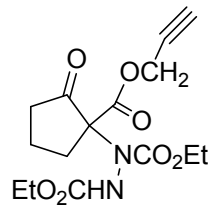

**4i**

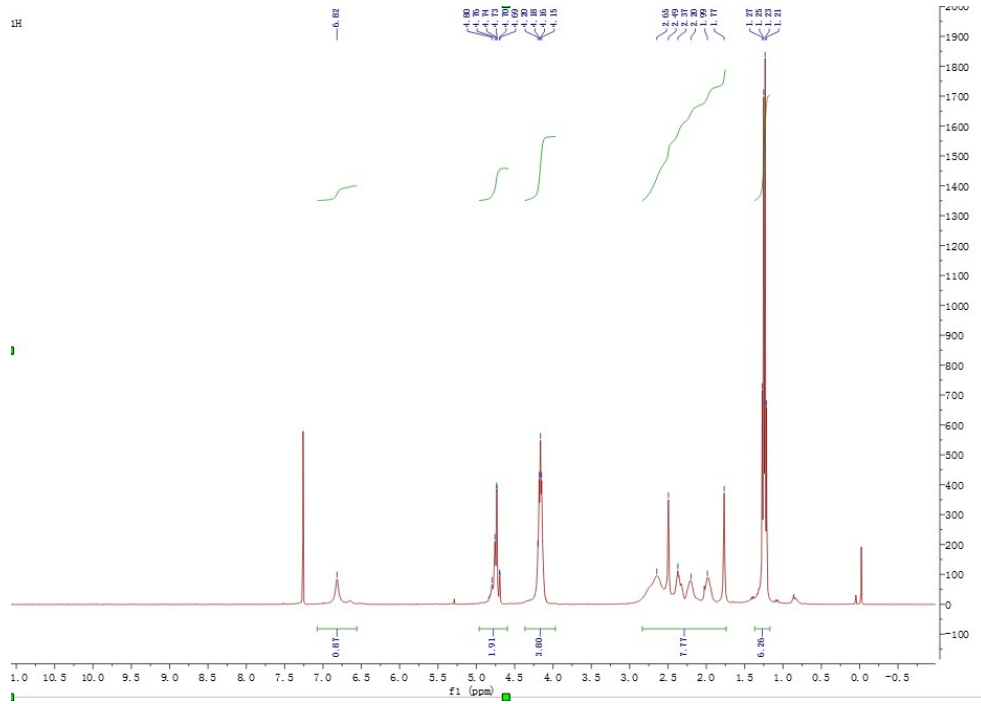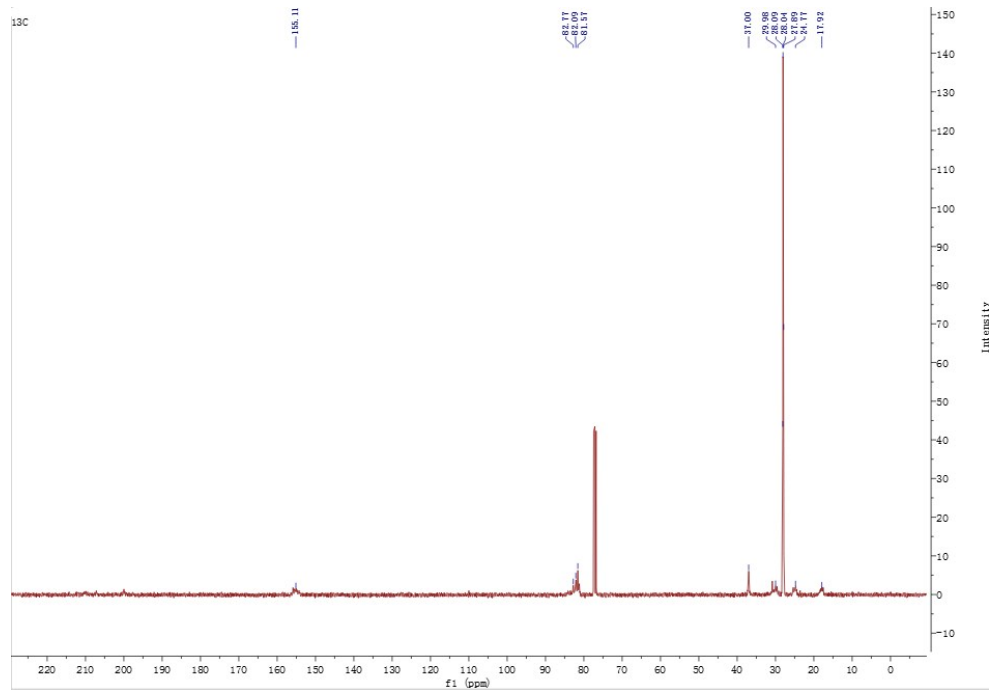

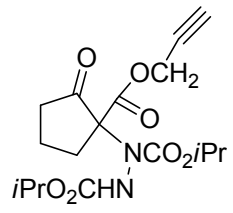

4j

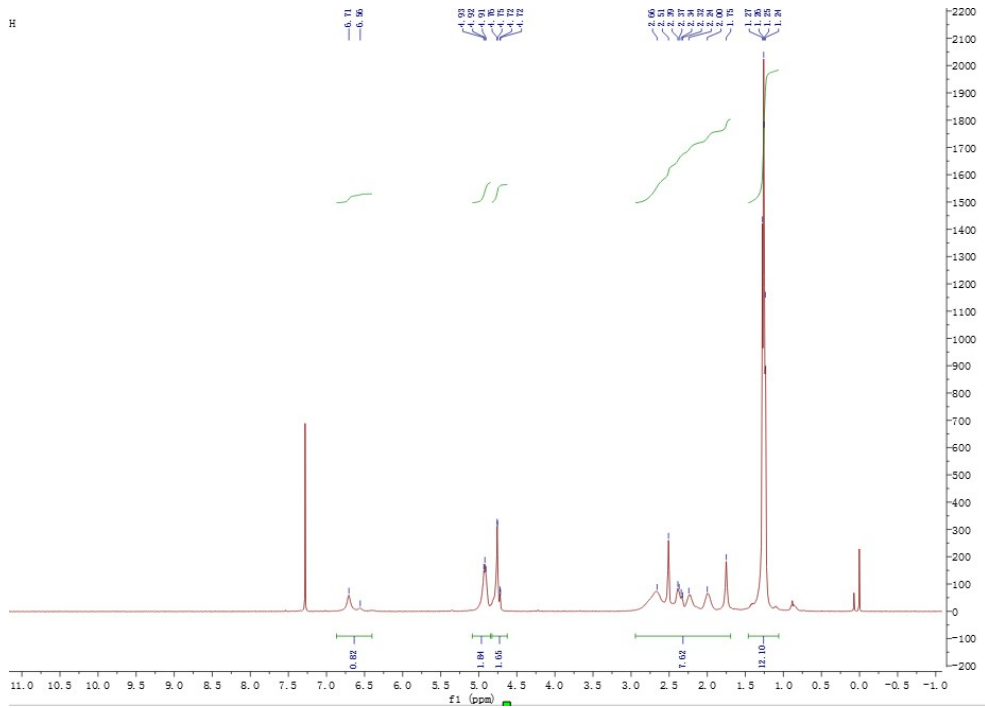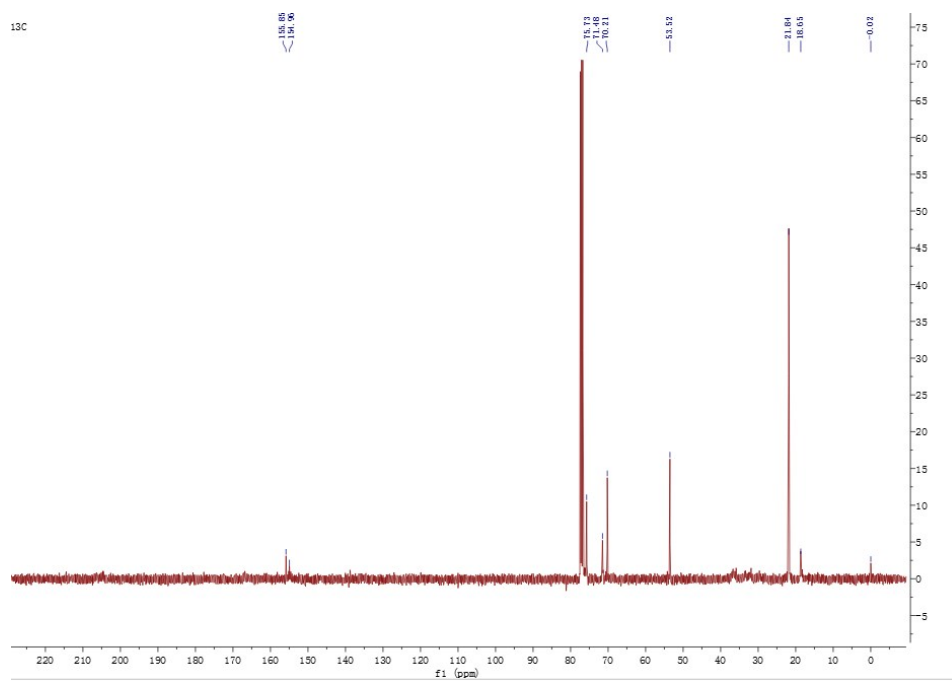

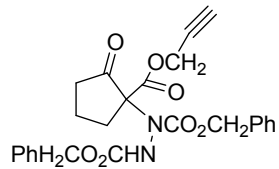

4k

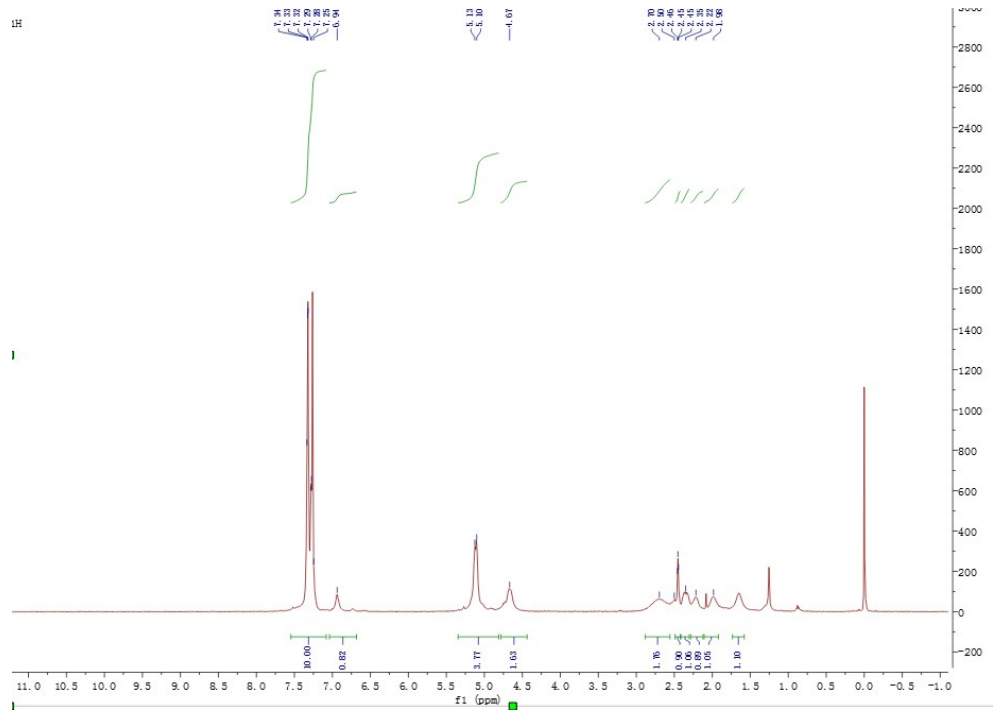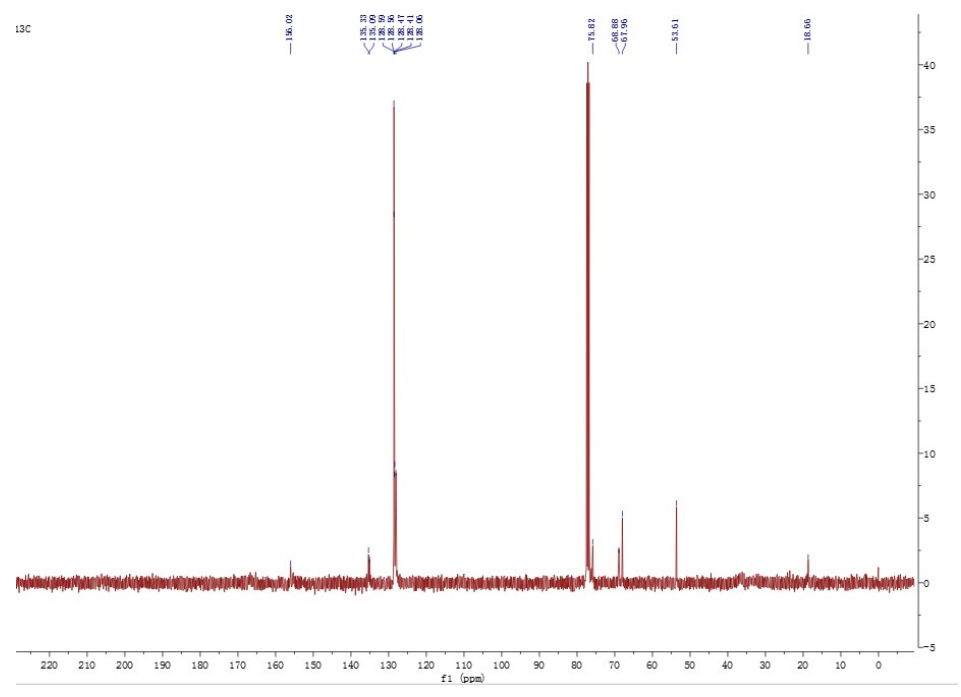

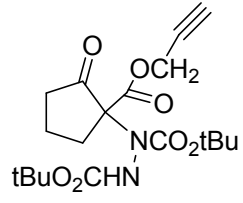

41

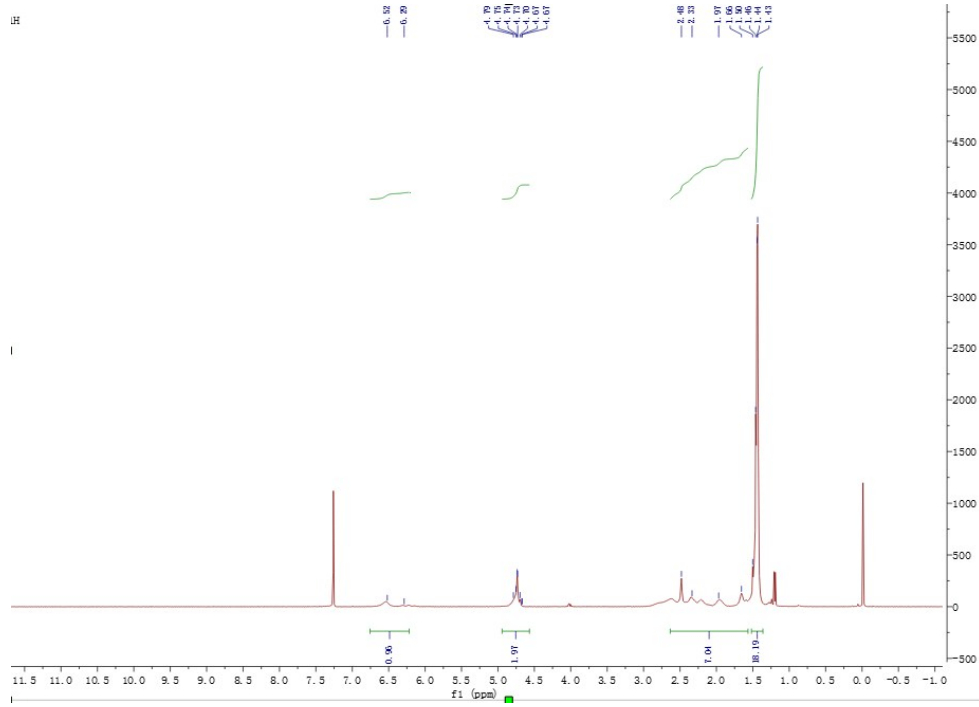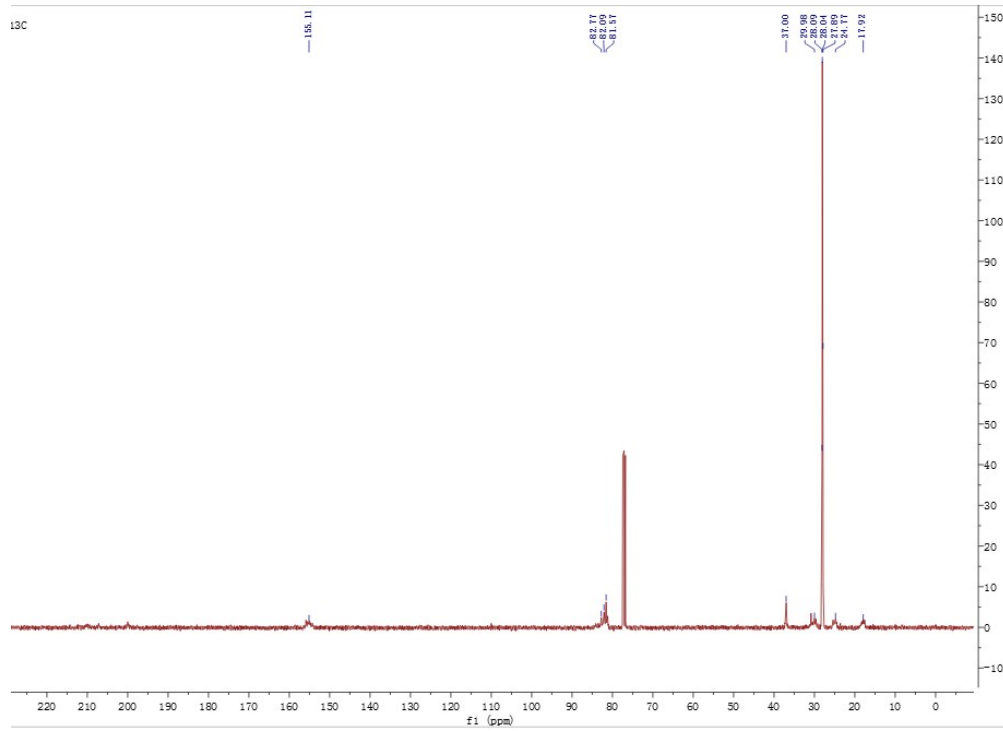

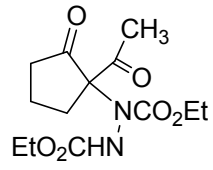

4m

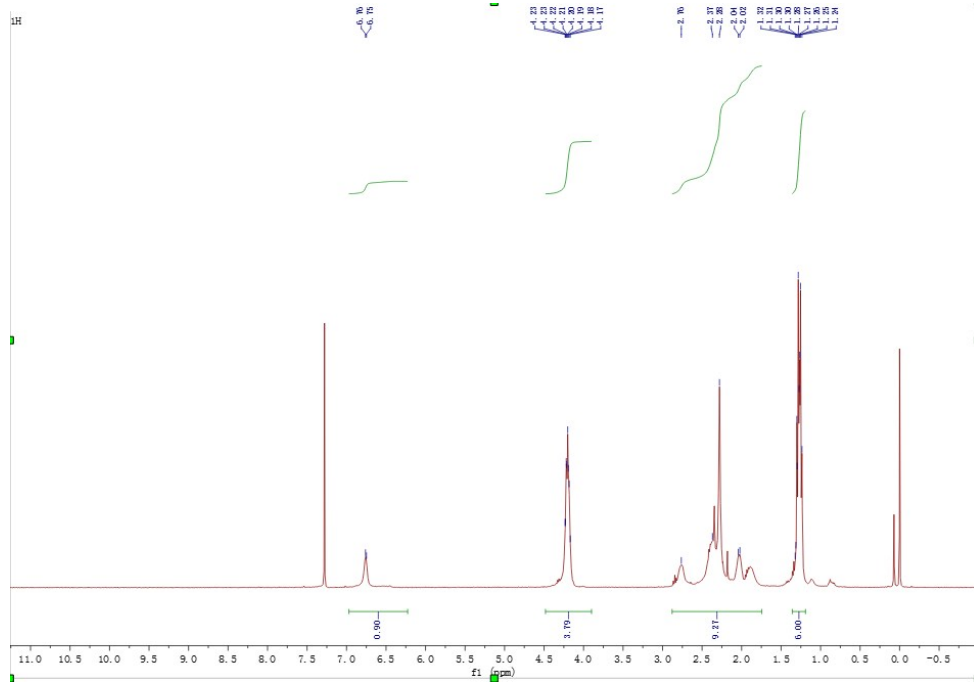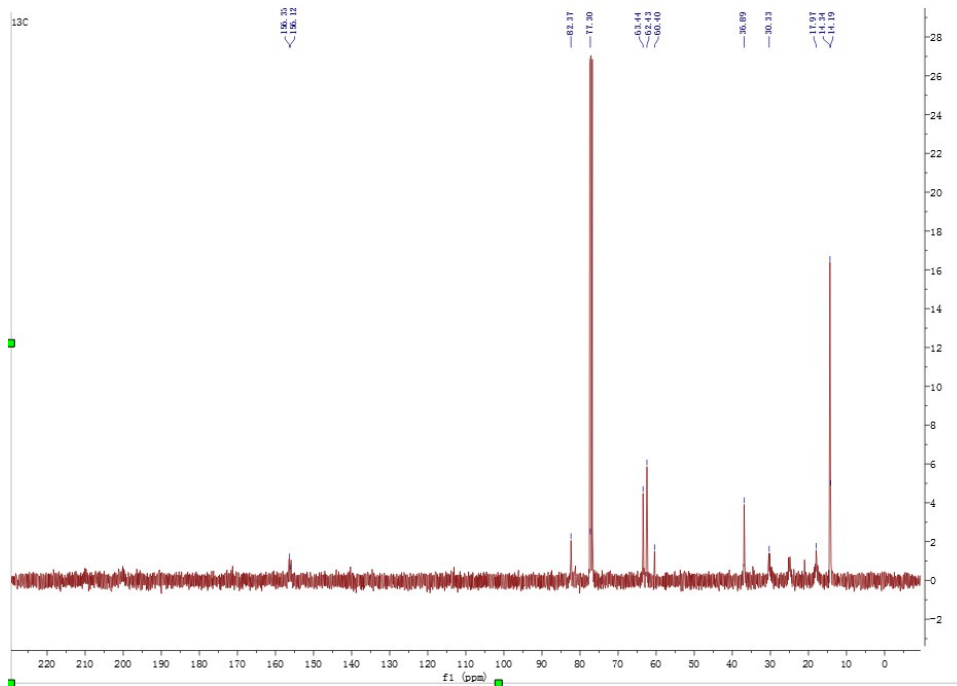



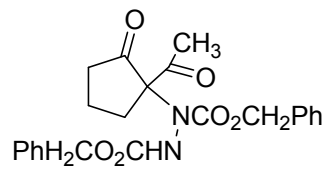

4o

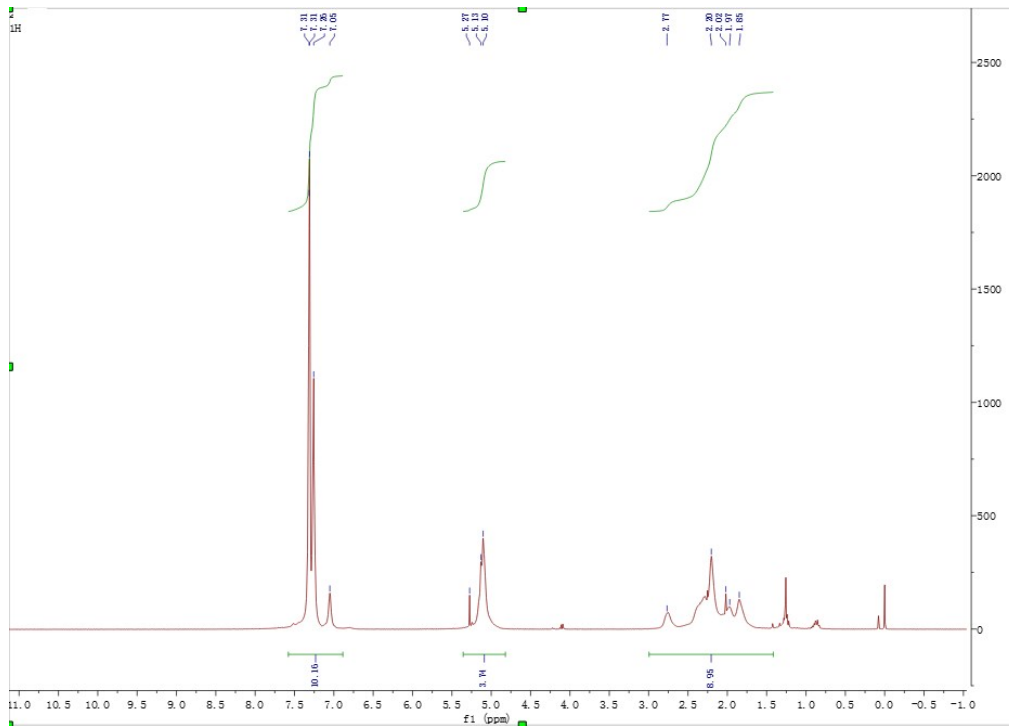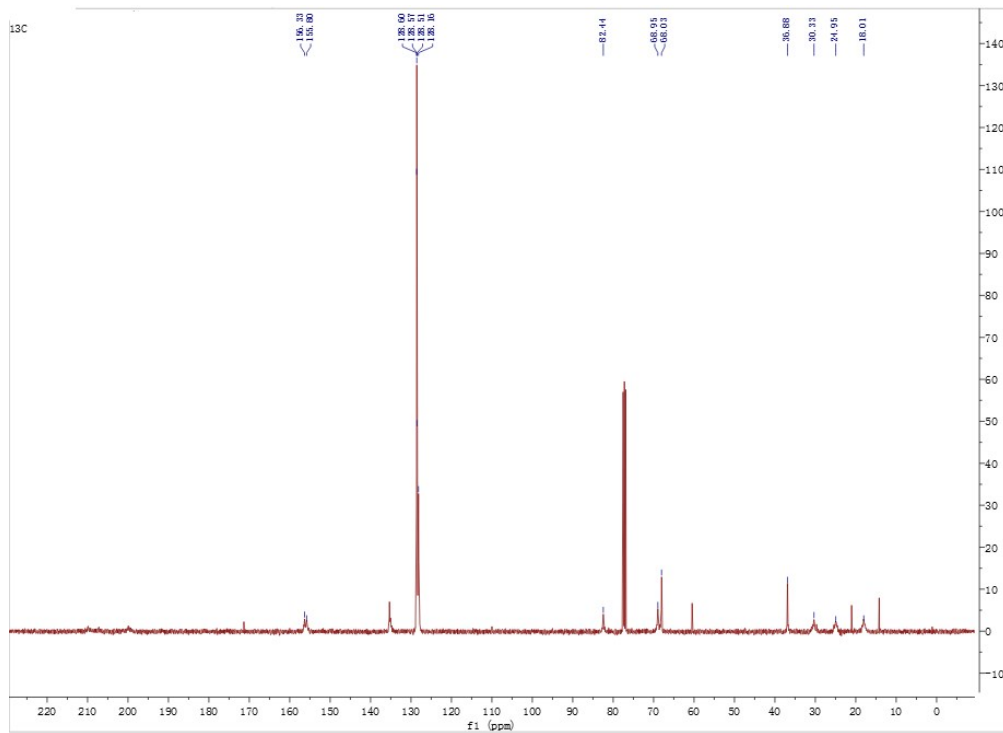



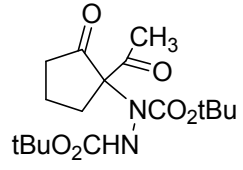

4p

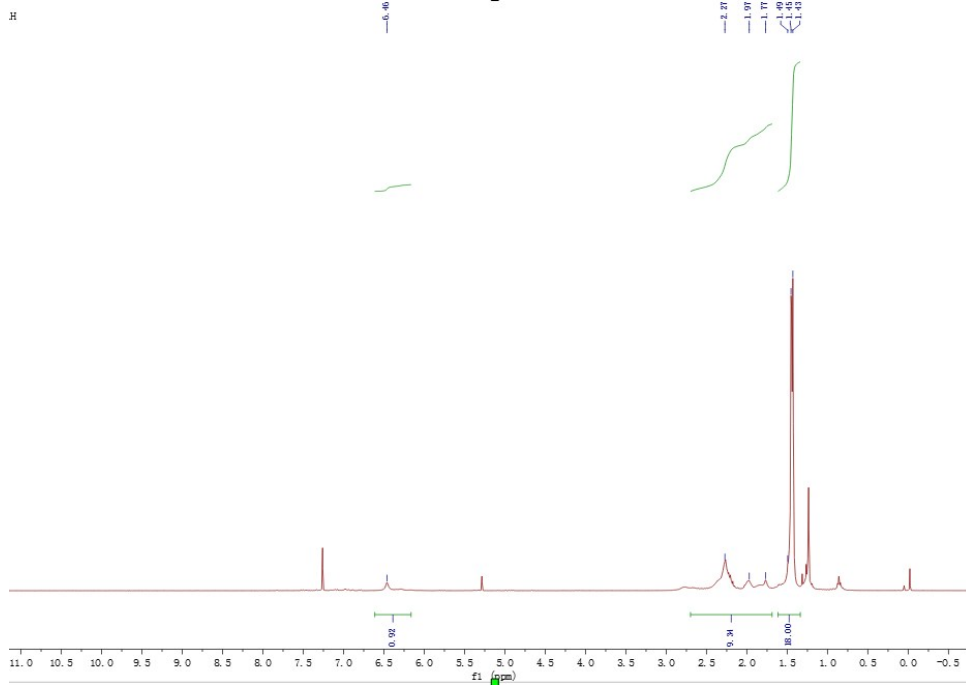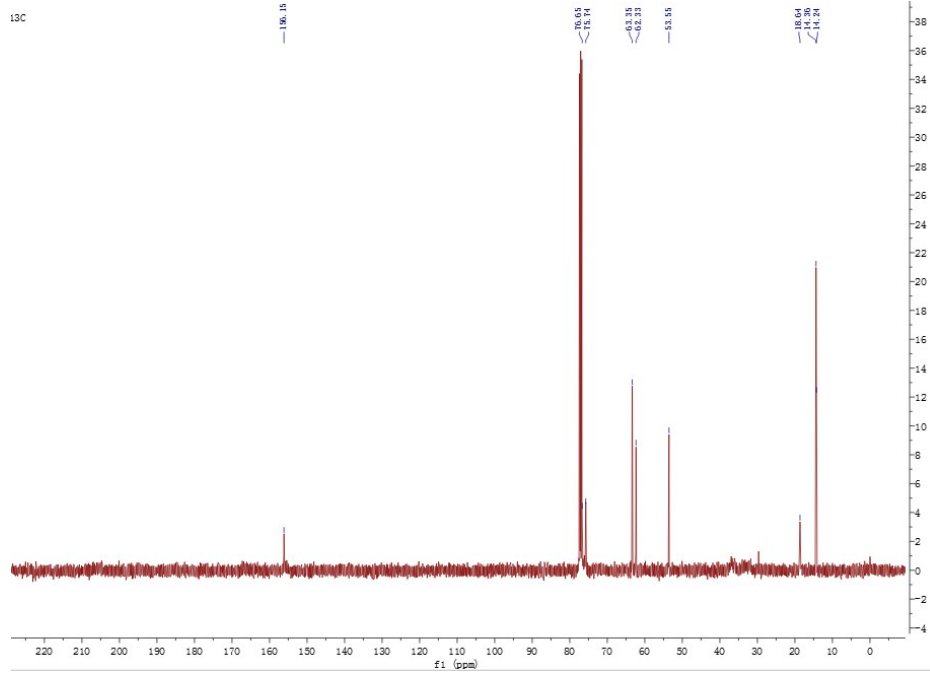



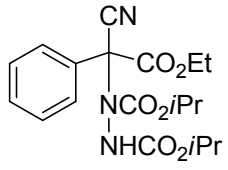

4r

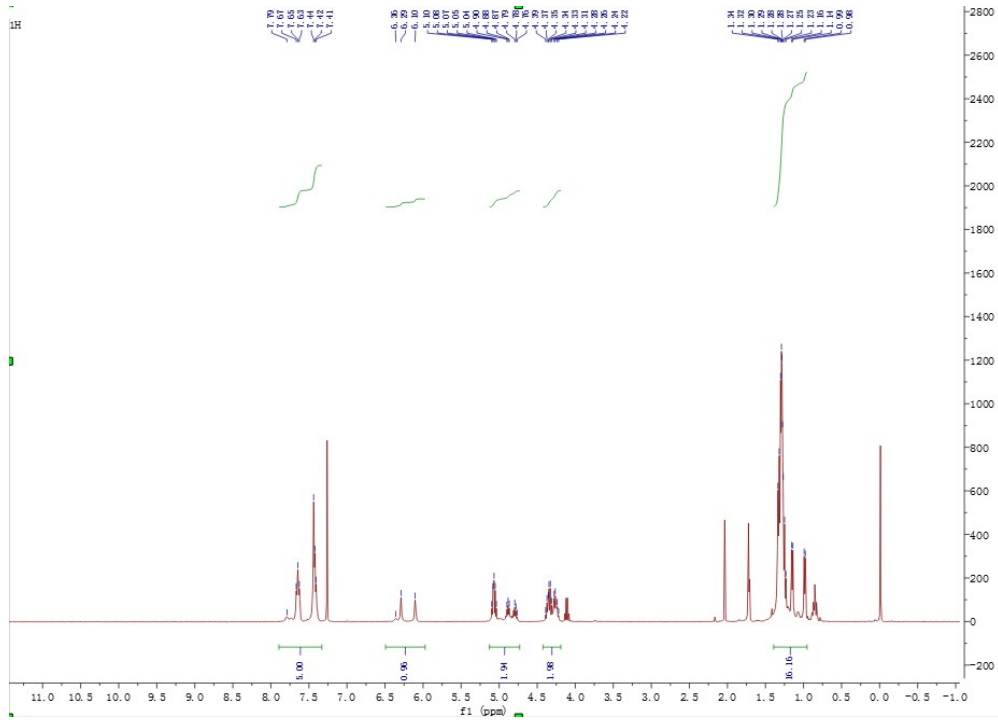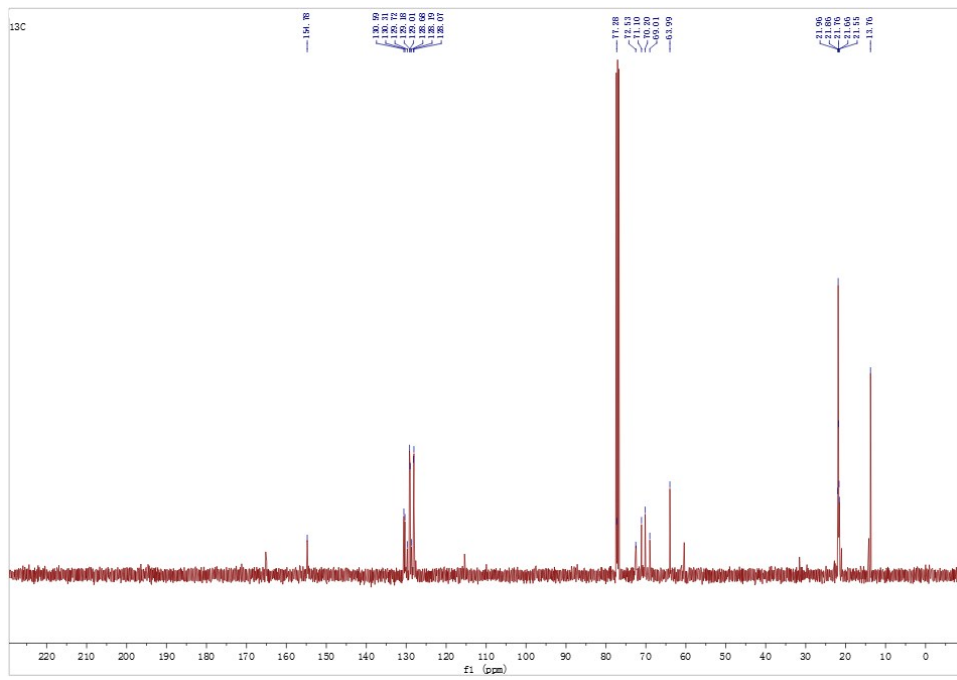

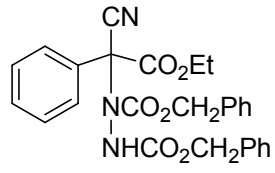

4s

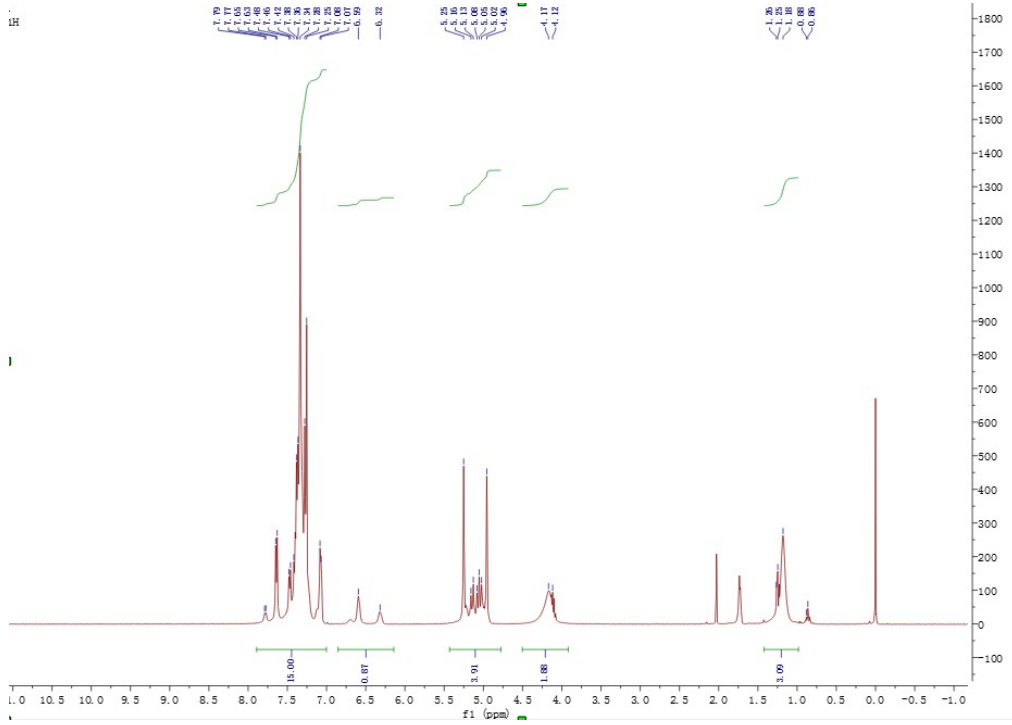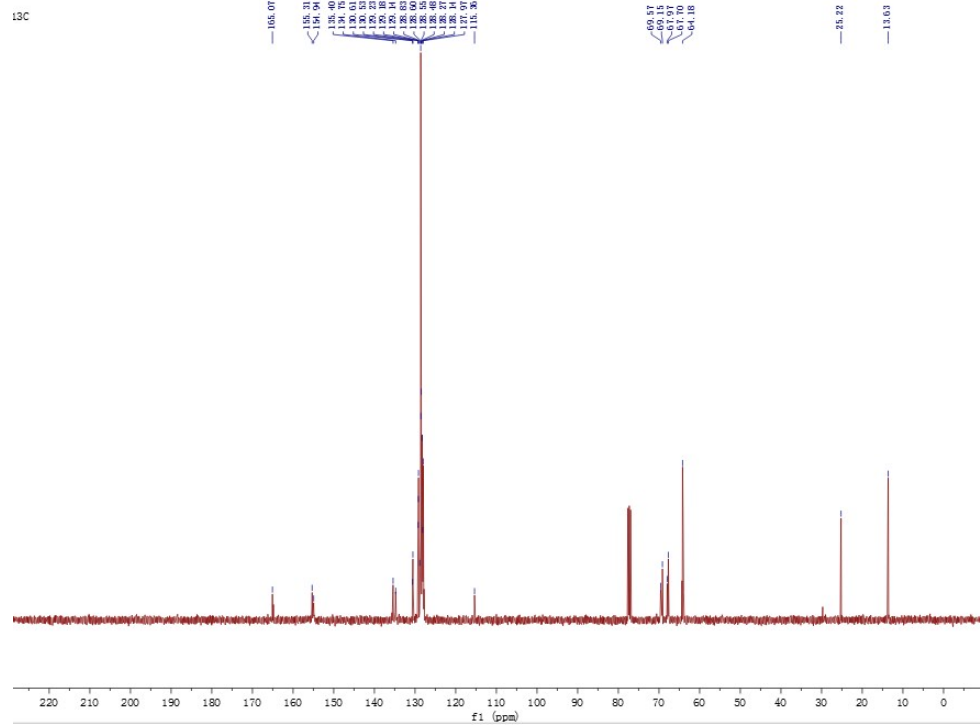

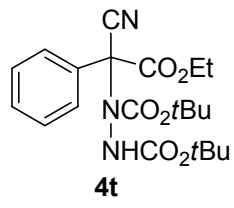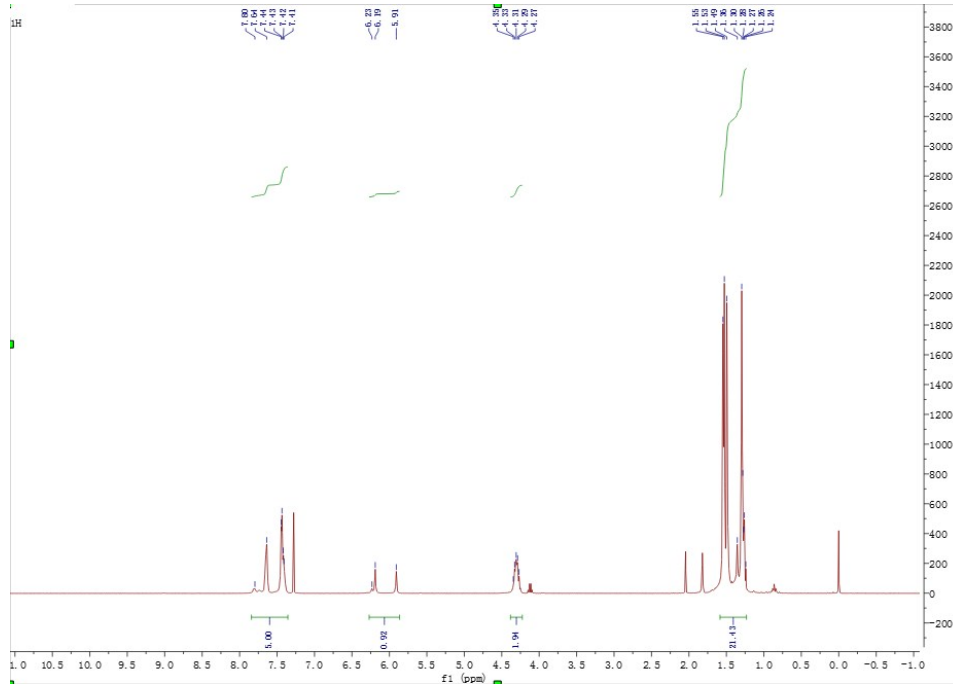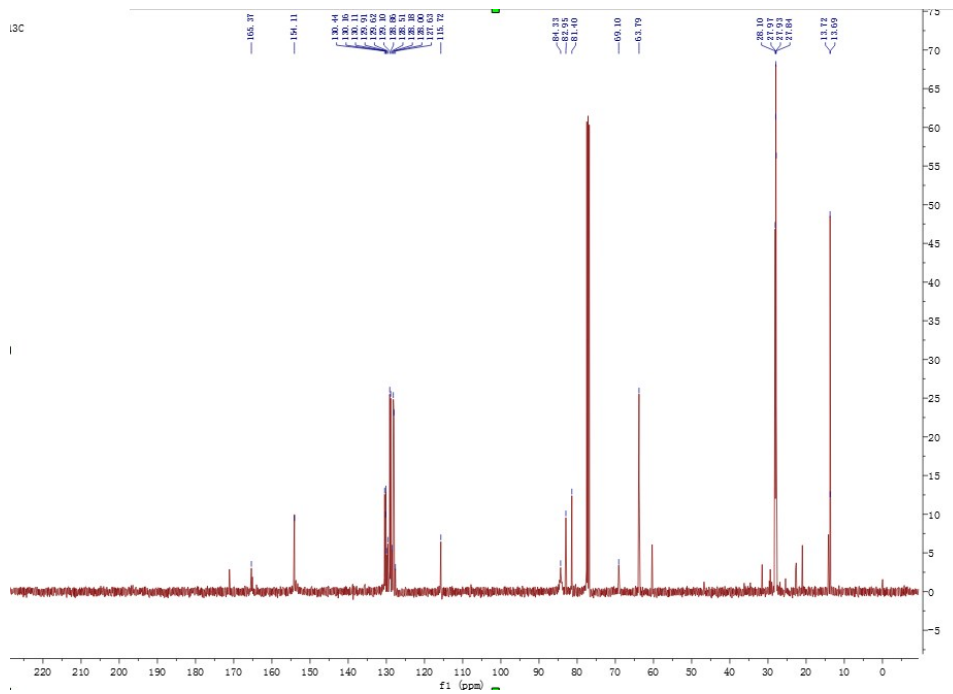

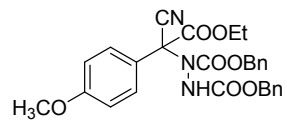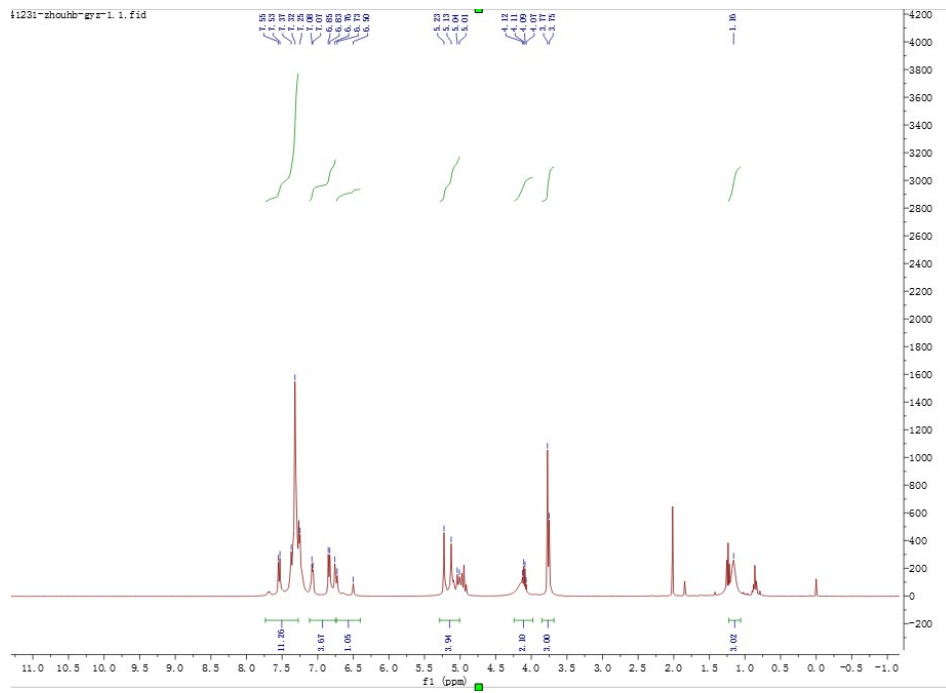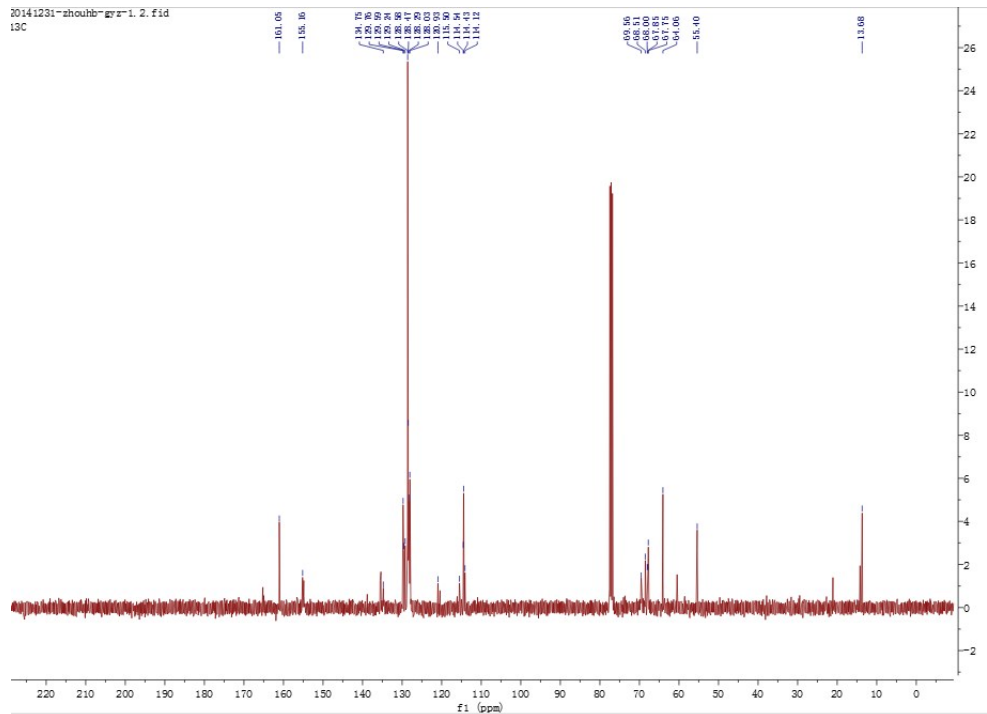



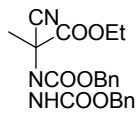

4w

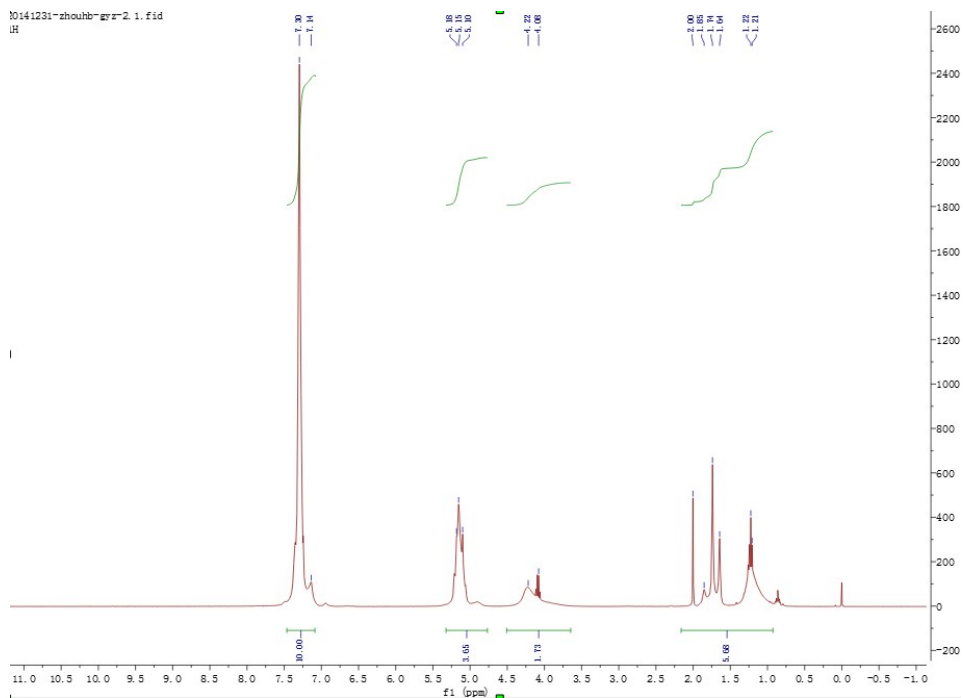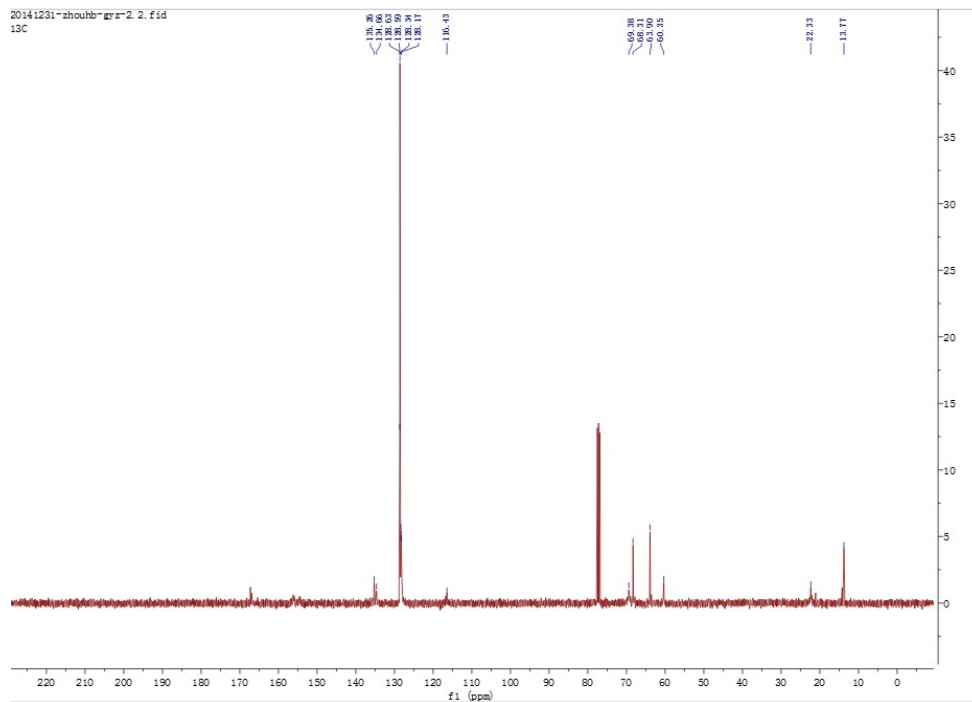



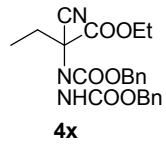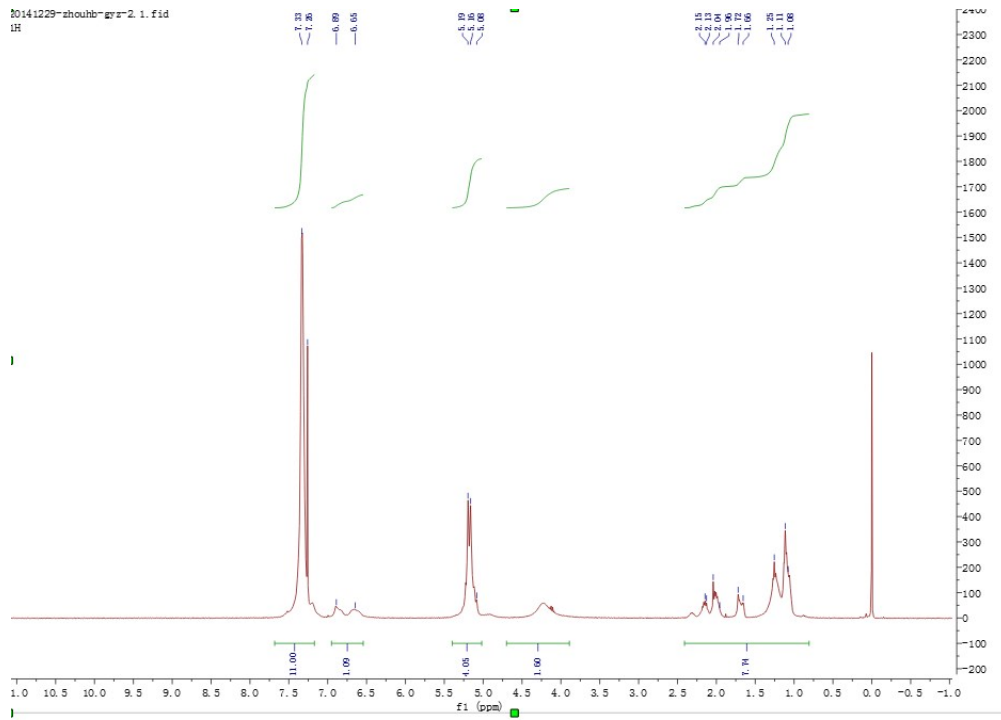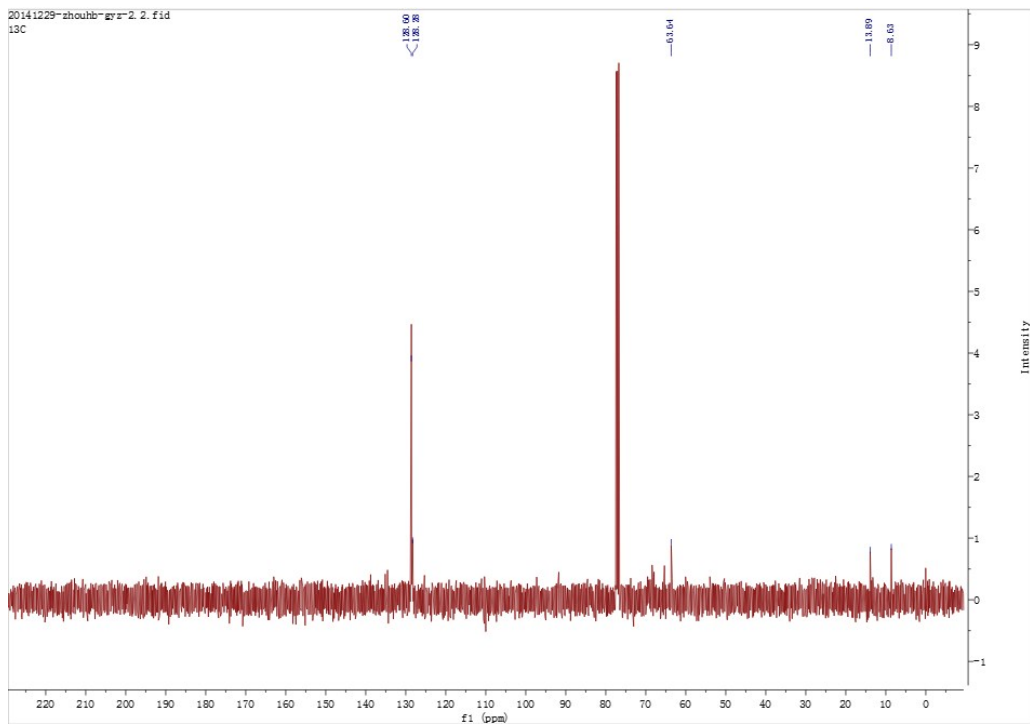

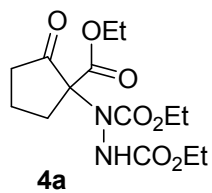

Chiralpak AD-H, 5% iPrOH in hexanes, 1.0 mL/min, 210nm

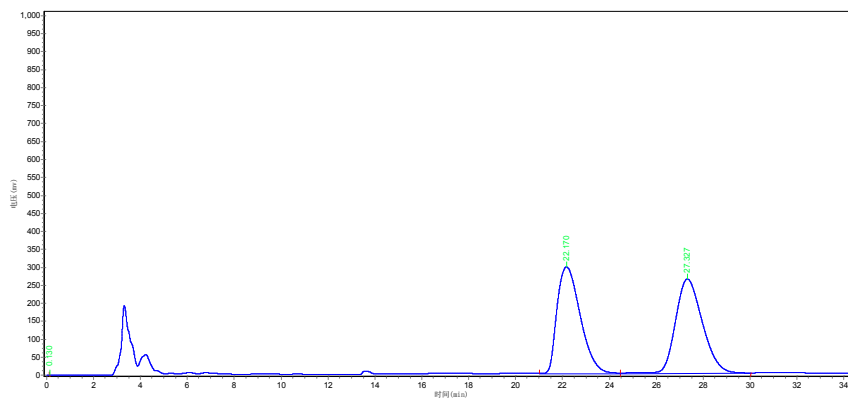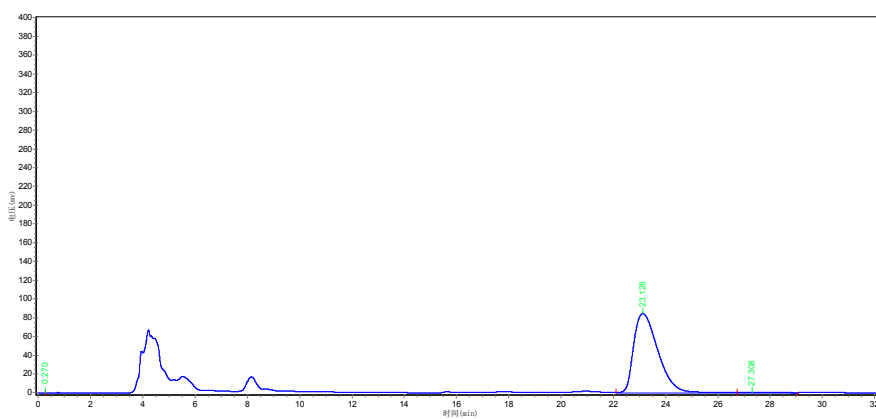

| Peak  | Ret. Time | Height    | Area        | Area (%) |
|-------|-----------|-----------|-------------|----------|
| 1     | 23.128    | 84730.172 | 5502276.000 | 97.1951  |
| 2     | 27.308    | 438.346   | 44649.945   | 1.8049   |
| Total |           |           |             | 100      |

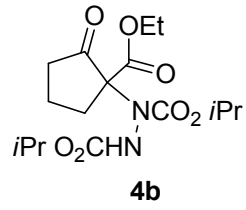

Chiralpak AD-H, 10% iPrOH in hexanes, 1.0 mL/min, 210nm

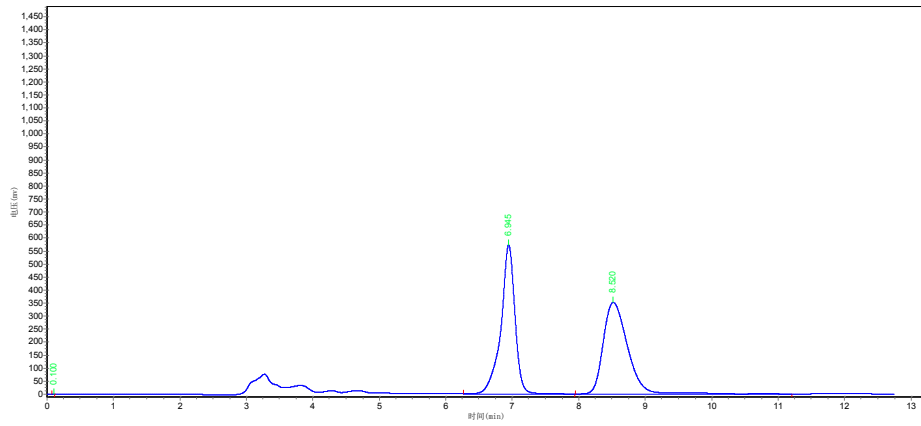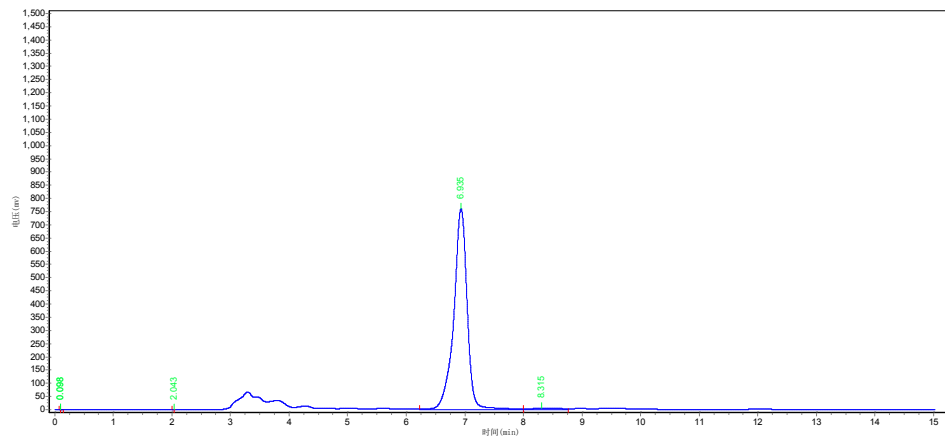

| Peak  | Ret. Time | Height     | Area         | Area (%) |
|-------|-----------|------------|--------------|----------|
| 1     | 6.9835    | 761600.125 | 12152825.000 | 98.5024  |
| 2     | 8.315     | 5092.693   | 184761.375   | 1.4976   |
| Total |           |            |              | 100      |

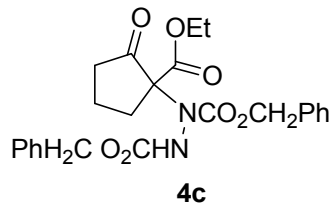

**4c** Chiralpak AS-H, 10% iPrOH in hexanes, 0.65mL/min, 254nm

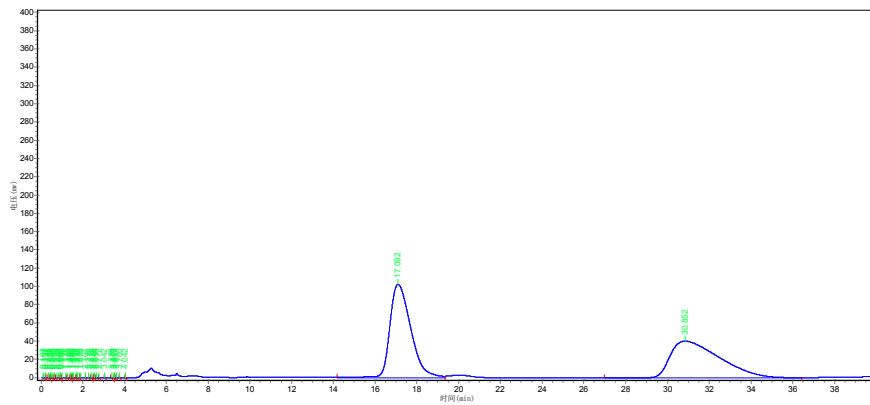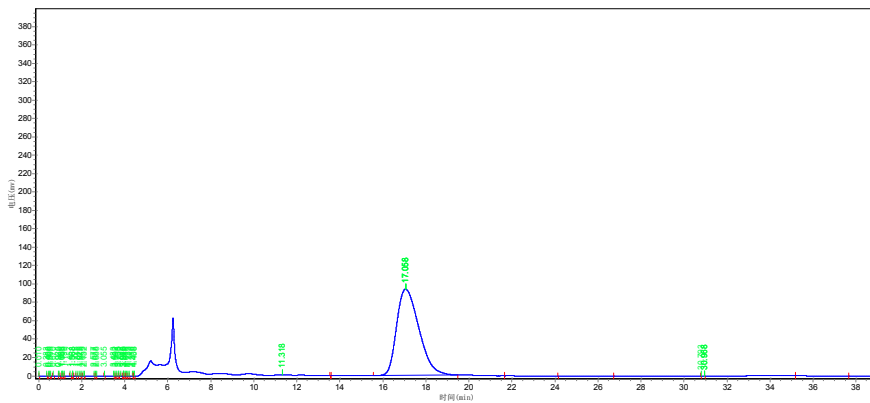

| Peak   | Ret. Time | Height    | Area        | Area (%) |
|--------|-----------|-----------|-------------|----------|
| 1      | 17.058    | 93703.883 | 6739804.500 | 99.9980  |
| 2      | 30.793    | 1.692     | 1.050       | 0.0020   |
| Totals |           |           |             | 100      |

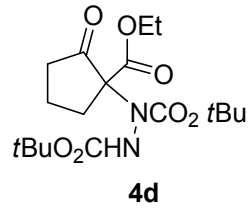

Chiralpak AD-H, 20% *i*PrOH/hexane, 0.8mL/min, 210 nm.

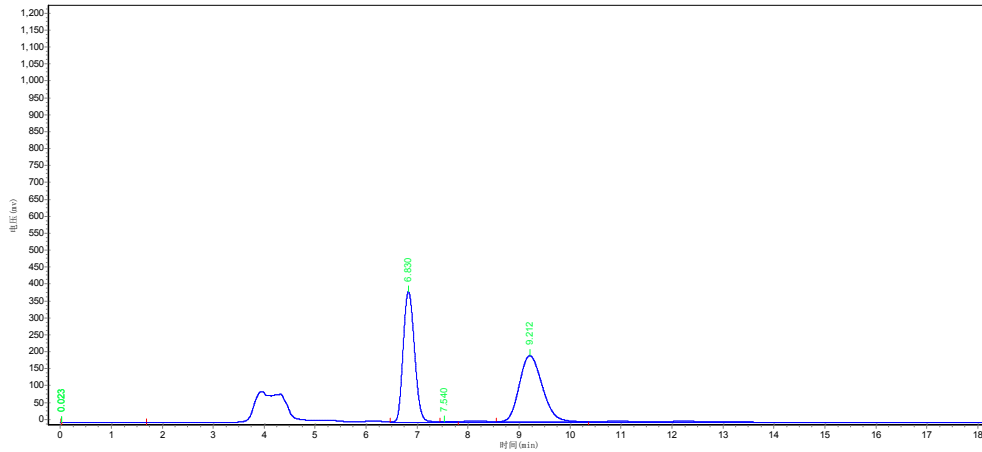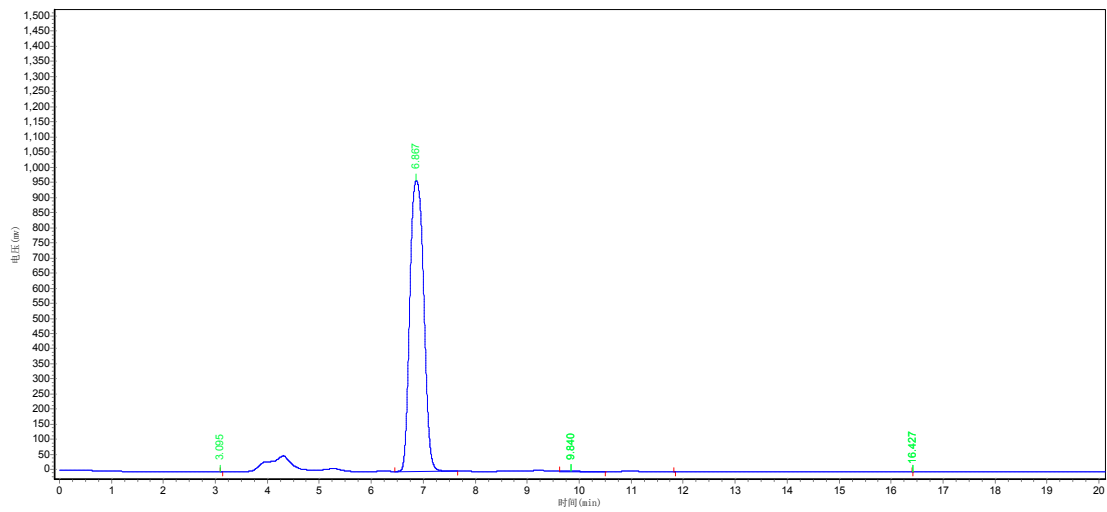

| Peak   | Ret. Time | Height     | Area         | Area (%) |
|--------|-----------|------------|--------------|----------|
| 1      | 6.867     | 961030.125 | 17737688.000 | 99.6340  |
| 2      | 9.840     | 2364.933   | 64971.461    | 0.3660   |
| Totals |           |            |              | 100      |

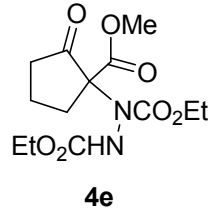

Chiralpak AD-H, 5%*i*PrOH in hexane, 1.0mL/min, 210nm

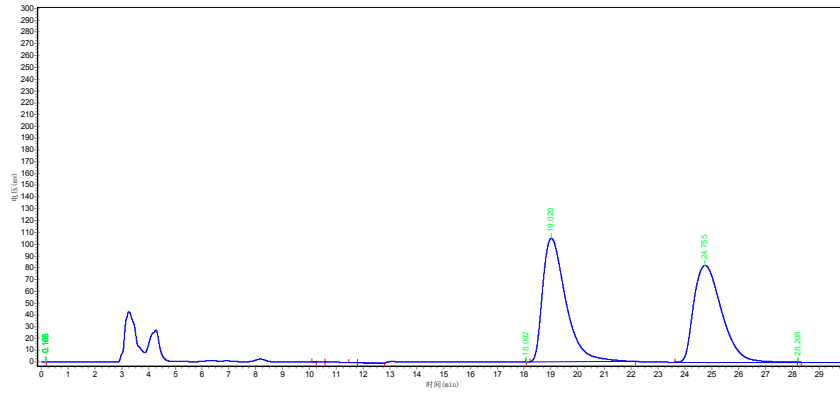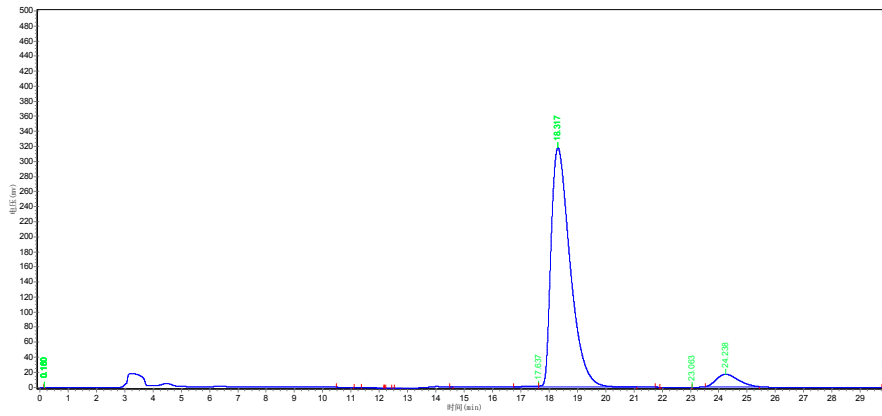

| Peak   | Ret. Time | Height     | Area         | Area (%) |
|--------|-----------|------------|--------------|----------|
| 1      | 18.317    | 317867.219 | 14792808.000 | 94.7205  |
| 2      | 24.238    | 16386.1501 | 866449.500   | 5.2795   |
| Totals |           |            |              | 100      |

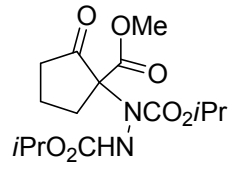

**4f**

Chiralpak AD-H, 20% *i*PrOH in hexanes, 0.8 mL/min, 210nm

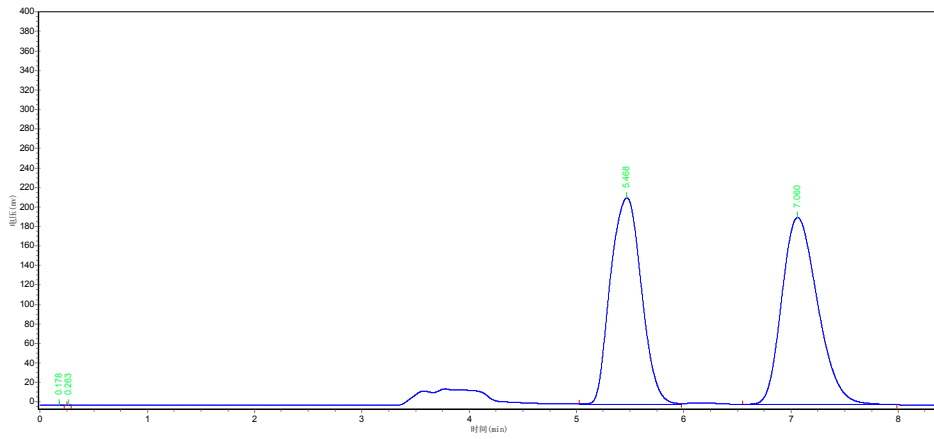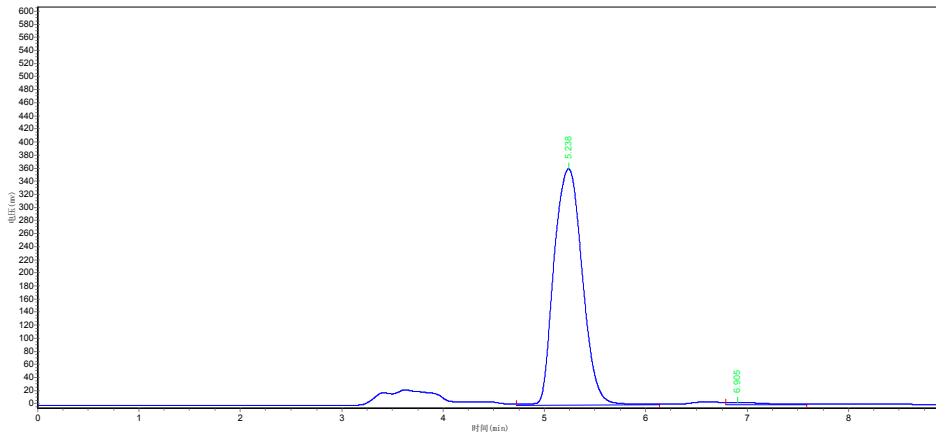

| Peak  | Ret. Time | Height     | Area        | Area (%) |
|-------|-----------|------------|-------------|----------|
| 1     | 5.238     | 361251.250 | 6997275.000 | 98.4777  |
| 2     | 6.905     | 3936.854   | 108163.383  | 1.5223   |
| Total |           |            |             | 100      |

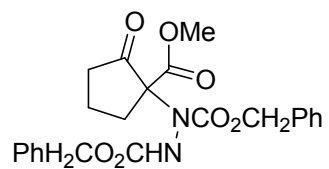

**4g**

Chiralpak AD-H, 30% *i*PrOH in hexanes, 0.65 mL/min, 254nm

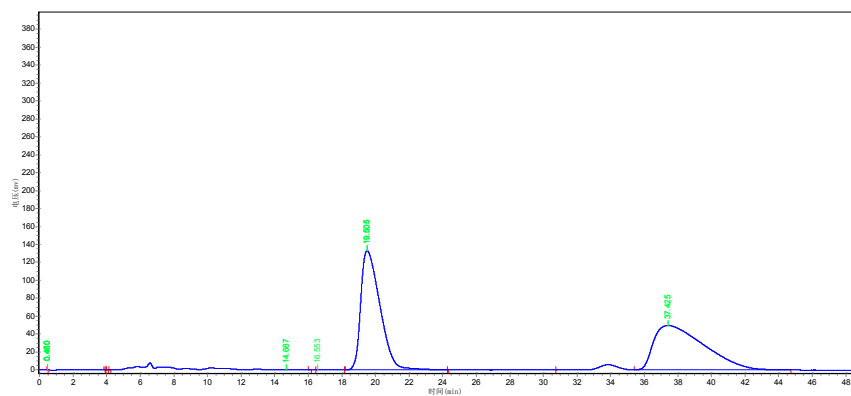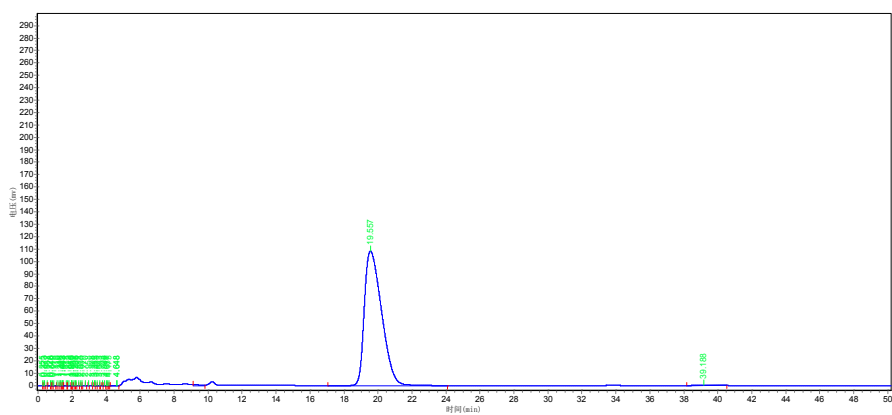

| Peak  | Ret. Time | Height     | Area        | Area (%) |
|-------|-----------|------------|-------------|----------|
| 1     | 19.557    | 108650.281 | 7728479.500 | 99.4020  |
| 2     | 39.188    | 611.017    | 46490.750   | 0.5980   |
| Total |           |            |             | 100      |



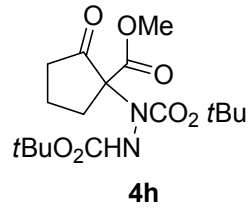

Chiralpak AD-H, 10% *i*PrOH in hexanes, 1.0 mL/min, 210nm

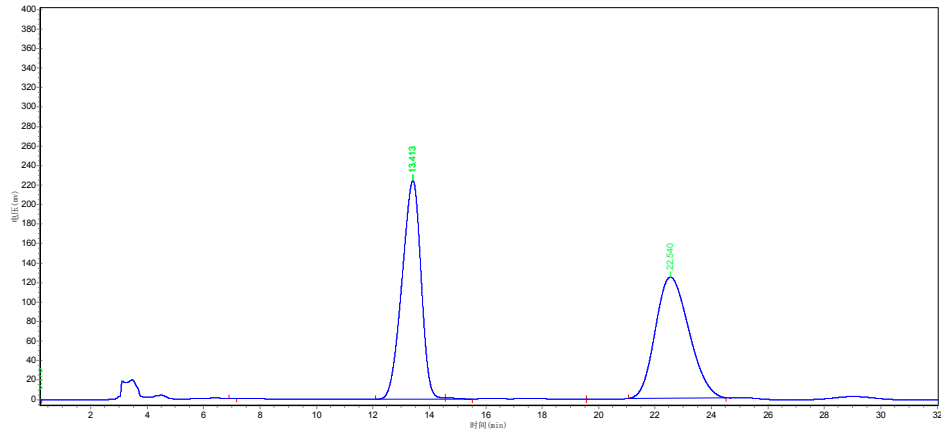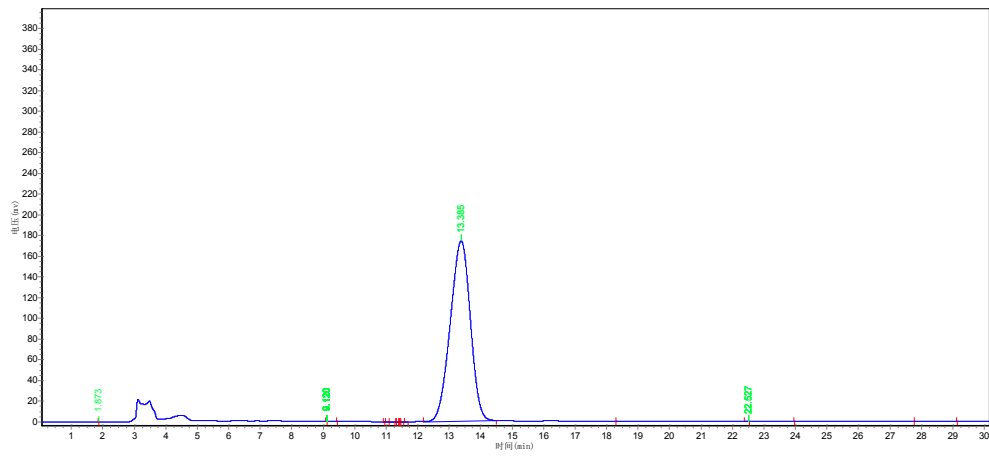

| Peak   | Ret. Time | Height     | Area        | Area (%) |
|--------|-----------|------------|-------------|----------|
| 1      | 13.385    | 174237.031 | 7703676.000 | 99.9970  |
| 2      | 22.527    | 324.245    | 20.569      | 0.0030   |
| Totals |           |            |             | 100      |

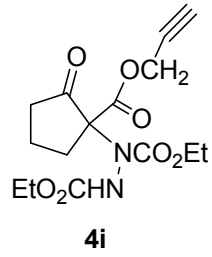

Chiralpak AD-H, 5%*i*PrOH in hexane, 1.0mL/min, 210nm

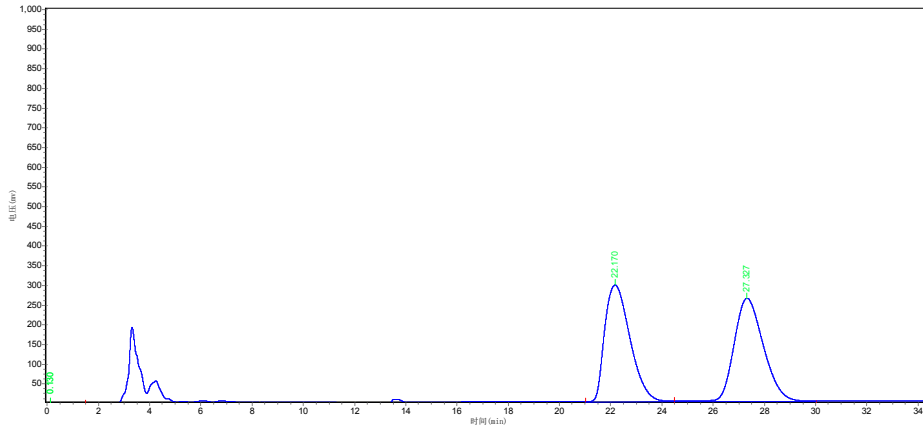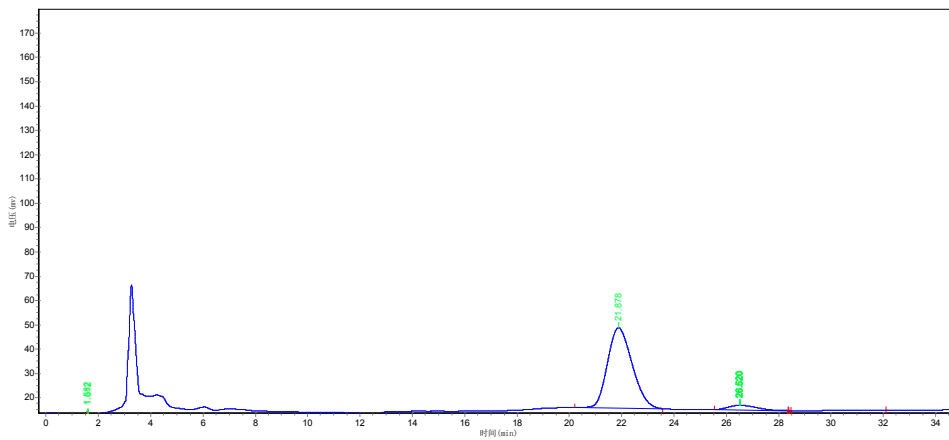

| Peak   | Ret. Time | Height    | Area        | Area (%) |
|--------|-----------|-----------|-------------|----------|
| 1      | 21.878    | 33745.617 | 2273638.250 | 95.0748  |
| 2      | 26.520    | 1952.783  | 143200.672  | 4.9252   |
| Totals |           |           |             | 100      |

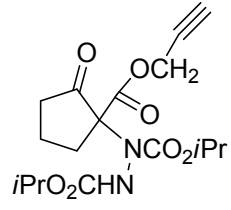

**4j**

Chiralpak AD-H, 10%*i*PrOH in hexane, 1.0mL/min, 210nm

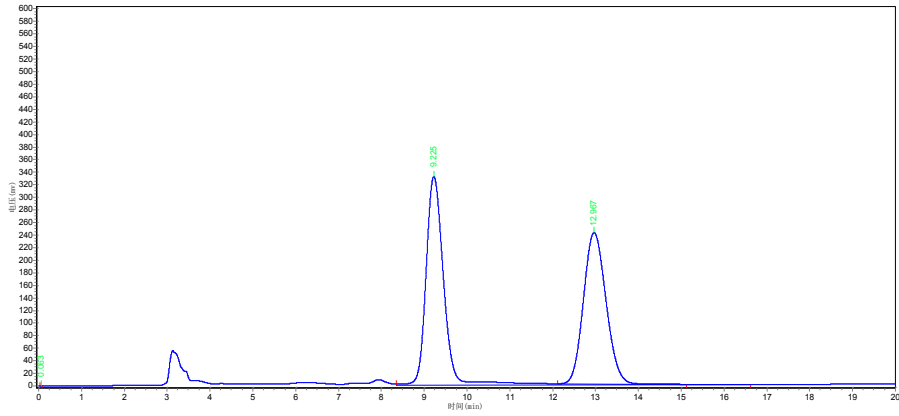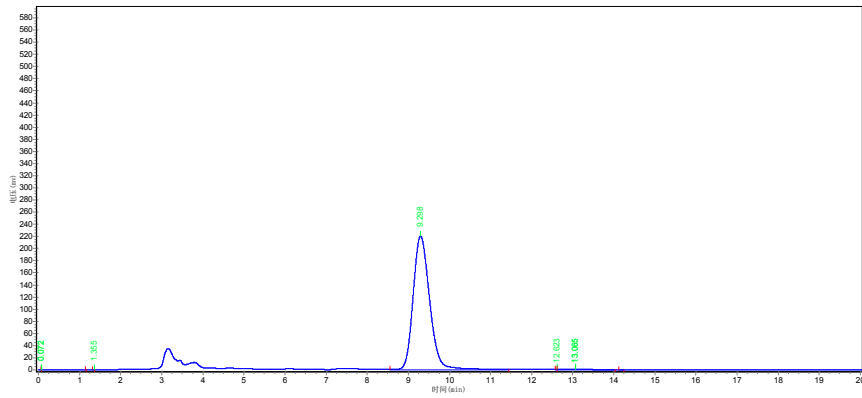

| Peak   | Ret. Time | Height     | Area        | Area (%) |
|--------|-----------|------------|-------------|----------|
| 1      | 9.298     | 220128.219 | 6158082.000 | 99.5952  |
| 2      | 13.065    | 628.000    | 25028.645   | 0.4048   |
| Totals |           |            |             | 100      |

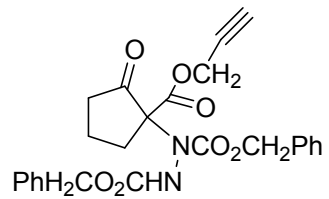

Chiralpak AD-H, 10% *i*PrOH in hexanes, 1.0 mL/min, 210nm

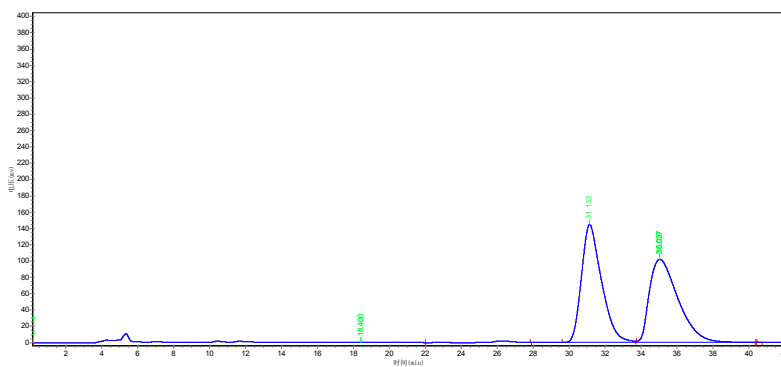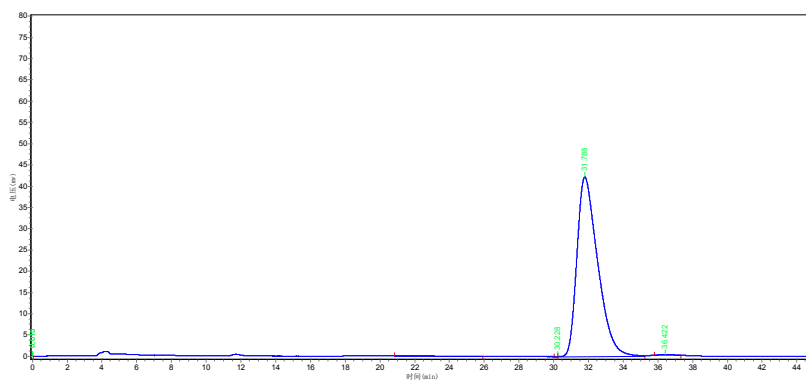

| Peak   | Ret. Time | Height    | Area        | Area (%) |
|--------|-----------|-----------|-------------|----------|
| 1      | 31.788    | 42256.422 | 3509513.750 | 99.7413  |
| 2      | 36.422    | 164.674   | 9098.601    | 0.2587   |
| Totals |           |           |             | 100      |

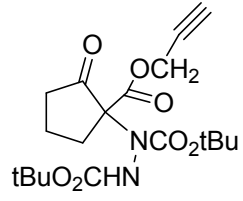

41

Chiralpak AD-H, 15% *i*PrOH in hexanes, 1.0 mL/min, 210nm

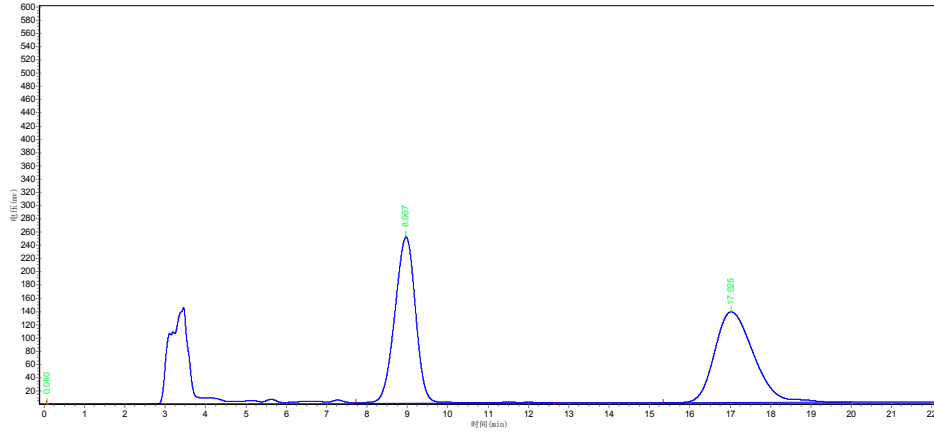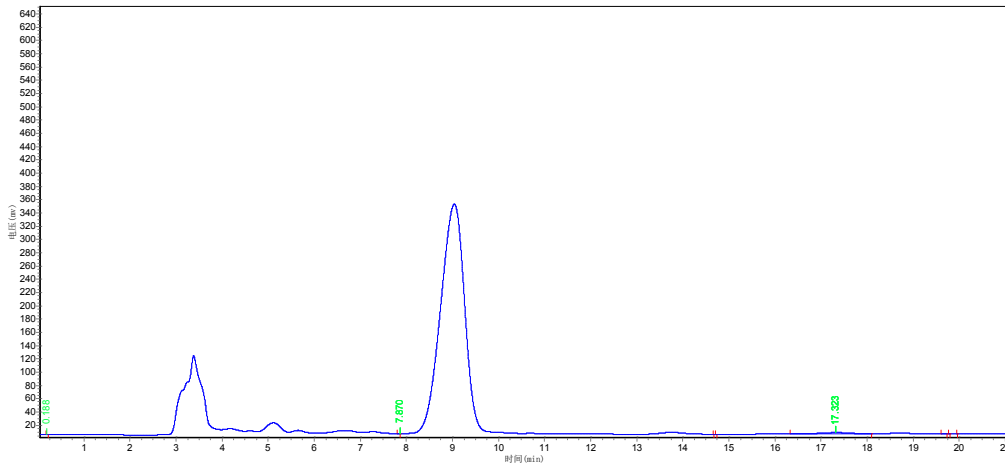

| Peak   | Ret. Time | Height     | Area        | Area (%) |
|--------|-----------|------------|-------------|----------|
| 1      | 9.298     | 220128.219 | 6158082.000 | 99.5952  |
| 2      | 13.065    | 628.000    | 25028.645   | 0.4048   |
| Totals |           |            |             | 100      |

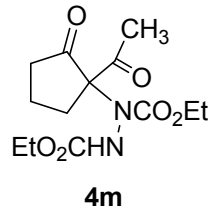

Chiralpak AD-H, 10% *i*PrOH/hexane, 1.0 mL/min, 210 nm.

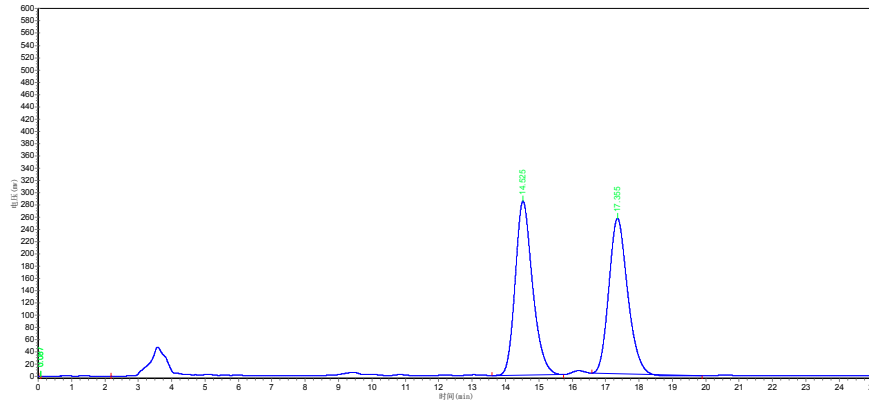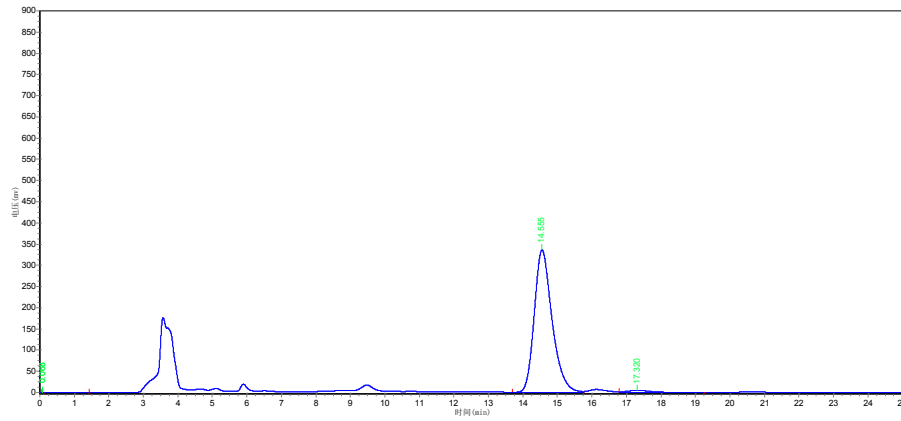

| Peak   | Ret. Time | Height     | Area         | Area (%) |
|--------|-----------|------------|--------------|----------|
| 1      | 14.555    | 336291.156 | 12100342.000 | 97.6553  |
| 2      | 17.320    | 5376.249   | 290526.781   | 2.3447   |
| Totals |           |            |              | 100      |

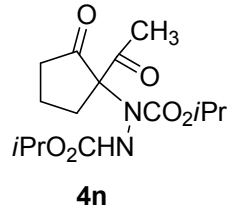

Chiralpak AD-H column, 10% *i*PrOH/hexane; 1.0 mL/min, 210 nm

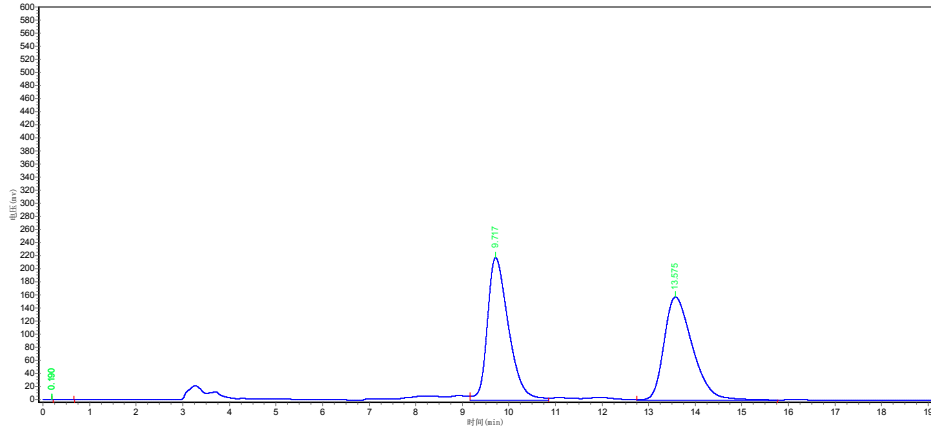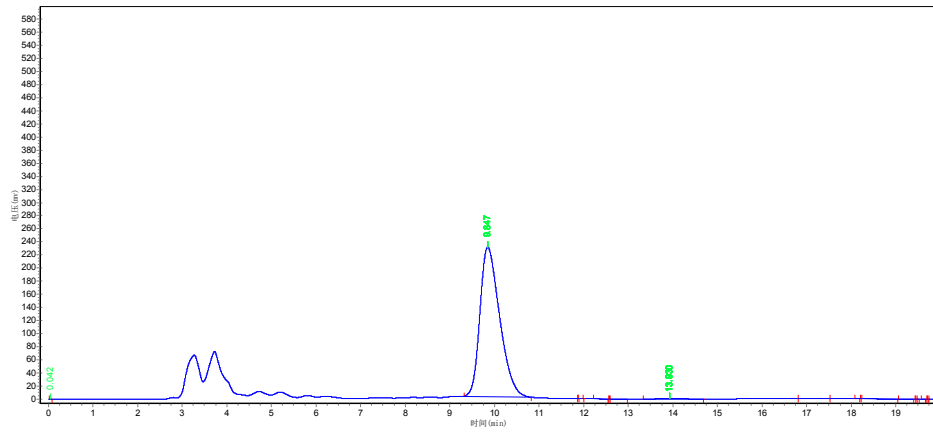

| Peak | Ret. Time | Height     | Area        | Area(%) |
|------|-----------|------------|-------------|---------|
| 1    | 9.847     | 227896.219 | 6987855.000 | 99.4007 |
| 2    | 13.930    | 1141.178   | 41706.027   | 0.5993  |

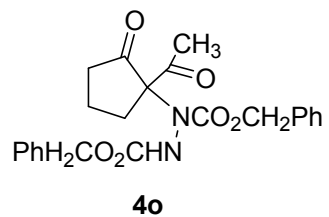

Chiralpak AS-H column, 30% *i*PrOH/hexane; 0.8 mL/min, 254 nm;

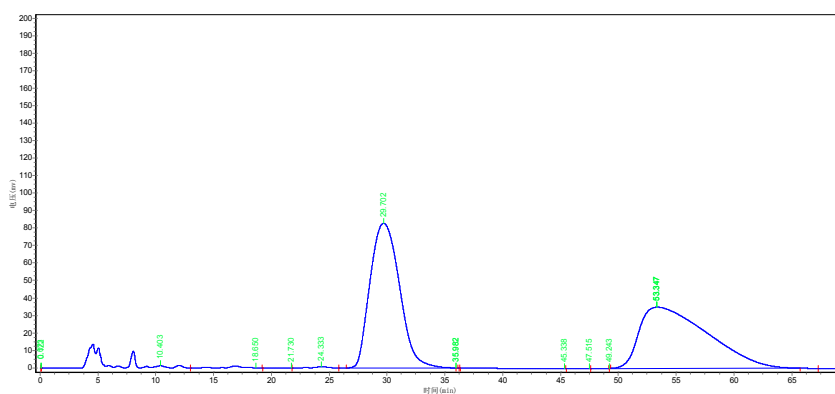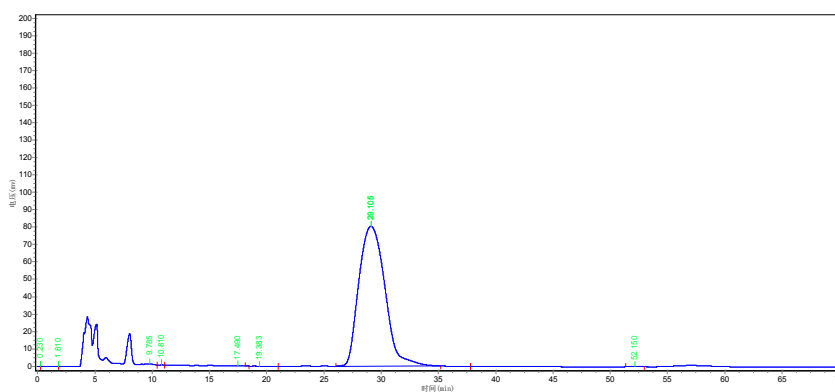

| Peak   | Ret. Time | Height    | Area         | Area (%) |
|--------|-----------|-----------|--------------|----------|
| 1      | 29.105    | 80422.070 | 12738561.000 | 99.9841  |
| 2      | 52.150    | 37.029    | 2040.302     | 0.0159   |
| Totals |           |           |              | 100      |



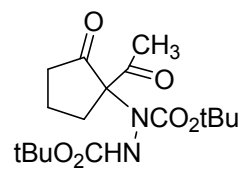

**4p**

Chiralpak AD-H column, 5% *i*PrOH/hexane; 1.0 mL/min, 210 nm;

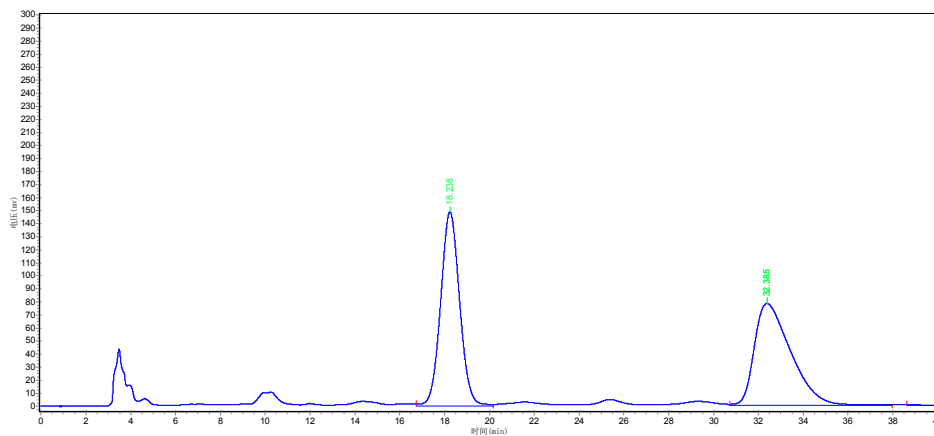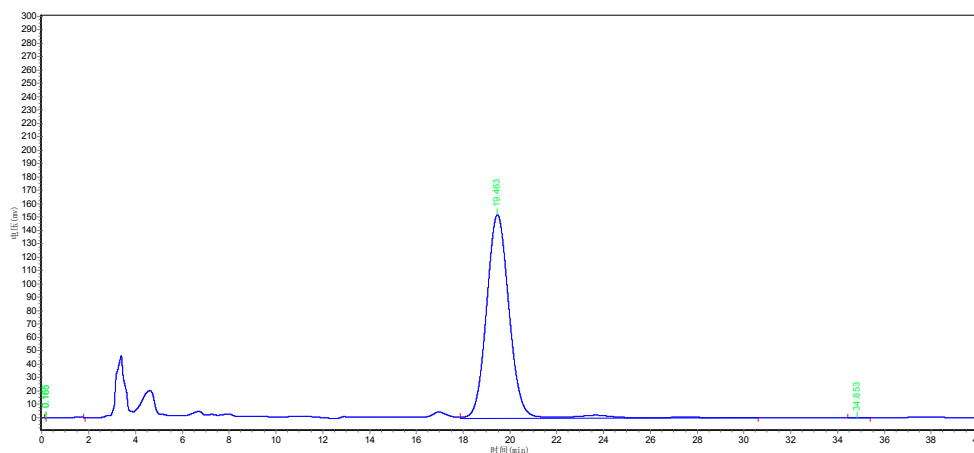

| Peak   | Ret. Time | Height     | Area         | Area (%) |
|--------|-----------|------------|--------------|----------|
| 1      | 19.463    | 152312.531 | 10426240.000 | 99.9921  |
| 2      | 34.853    | 40.518     | 818.350      | 0.0079   |
| Totals |           |            |              | 100      |

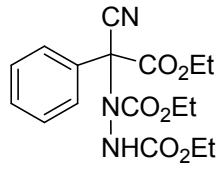

4q

Chiralpak AD-H column, 15% *i*PrOH/hexane; 0.8 mL/min, 210 nm;

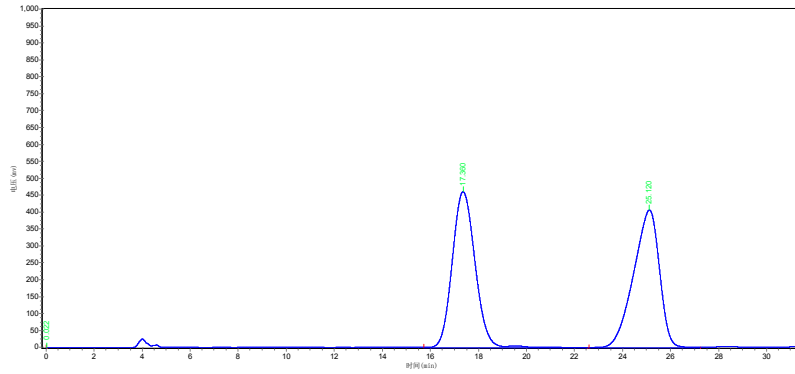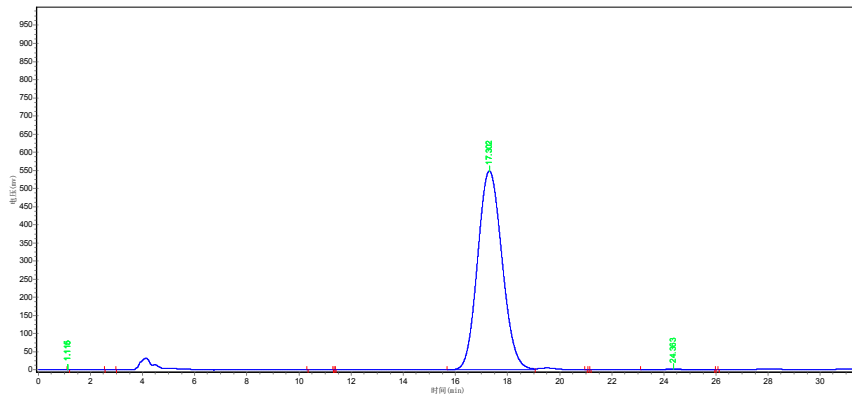

| Peak   | Ret. Time | Height     | Area         | Area (%) |
|--------|-----------|------------|--------------|----------|
| 1      | 17.302    | 548362.813 | 35705236.000 | 99.6054  |
| 2      | 24.363    | 2084.014   | 141431.109   | 0.3946   |
| Totals |           |            |              | 100      |

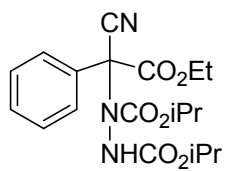

**4r**

Chiralpak AD-H column, 30% *i*PrOH/hexane; 0.8 mL/min, 210 nm;

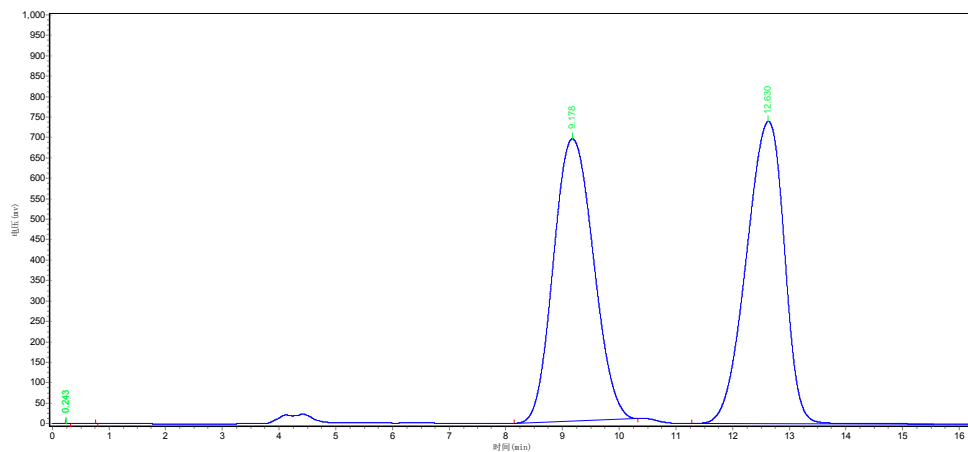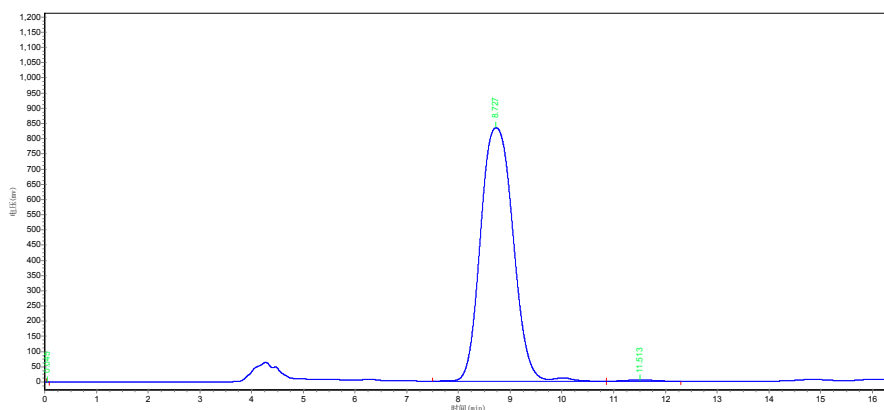

| Peak   | Ret. Time | Height     | Area         | Area (%) |
|--------|-----------|------------|--------------|----------|
| 1      | 8.727     | 834145.250 | 36441900.000 | 99.6072  |
| 2      | 11.513    | 4318.502   | 143692.422   | 0.3928   |
| Totals |           |            |              | 100      |

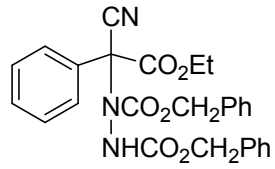

**4s**

Chiralpak OD-H column, 15% *i*PrOH/hexane; 1.0 mL/min, 210 nm;

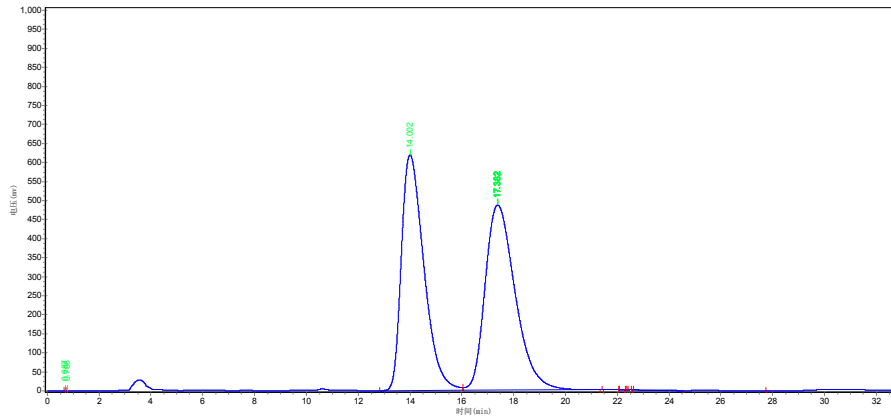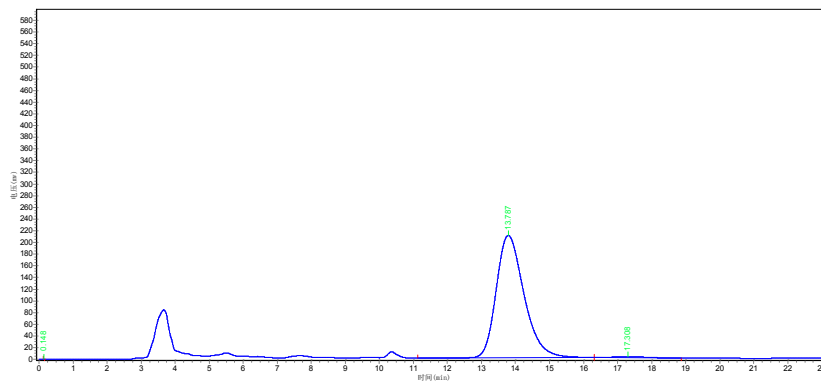

| Peak   | Ret. Time | Height     | Area         | Area (%) |
|--------|-----------|------------|--------------|----------|
| 1      | 13.787    | 209345.875 | 11879337.000 | 99.0442  |
| 2      | 17.308    | 1766.343   | 114638.984   | 0.9558   |
| Totals |           |            |              | 100      |

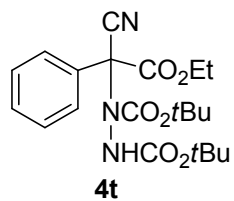

Chiralpak AD-H column, 30% *i*PrOH/hexane; 0.8 mL/min, 210 nm;

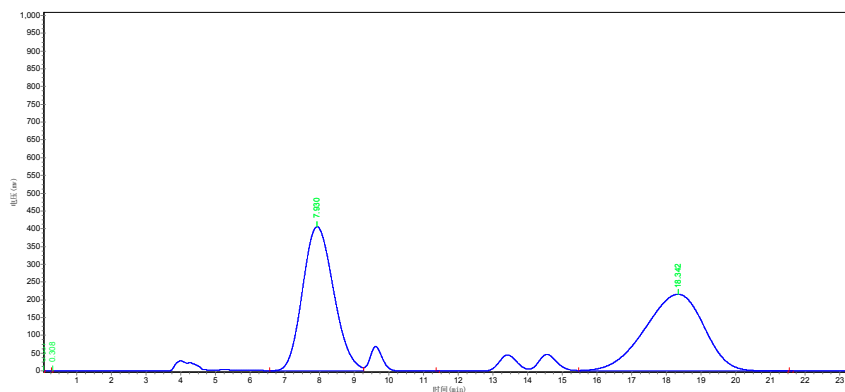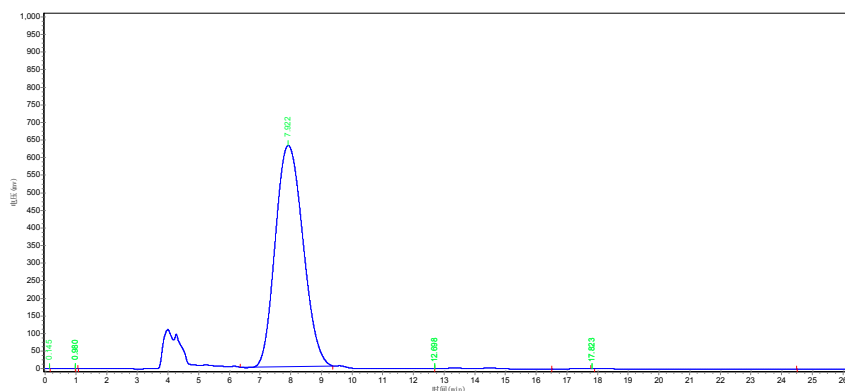

| Peak   | Ret. Time | Height     | Area         | Area (%) |
|--------|-----------|------------|--------------|----------|
| 1      | 7.922     | 628261.063 | 39305756.000 | 99.9005  |
| 2      | 17.823    | 447.651    | 0.498        | 0.0995   |
| Totals |           |            |              | 100      |

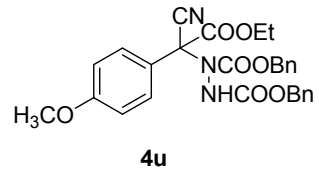

Chiralpak OD-H column, 20% *i*PrOH/hexane; 0.8 mL/min, 254 nm;

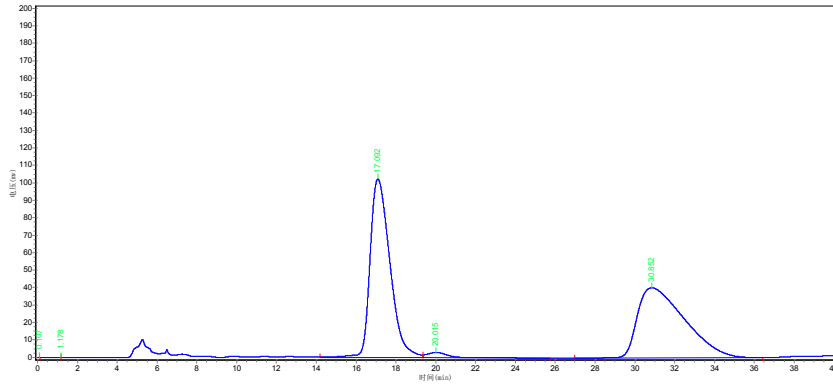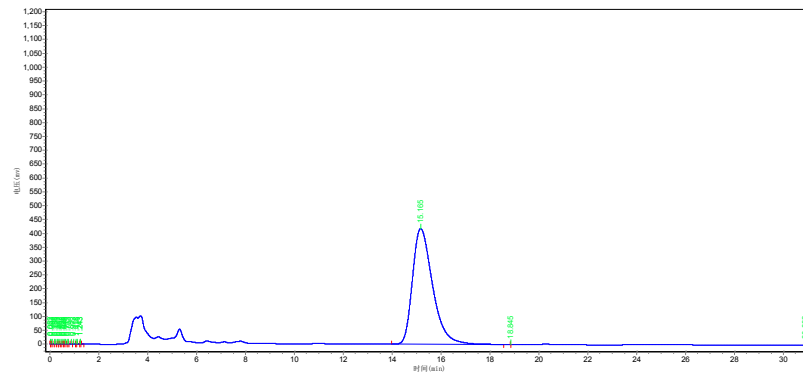

| Peak   | Ret. Time | Height     | Area         | Area (%) |
|--------|-----------|------------|--------------|----------|
| 1      | 15.165    | 417572.906 | 23856046.000 | 99.0904  |
| 2      | 18.845    | 4.4248     | 4.903        | 0.9096   |
| Totals |           |            |              | 100      |

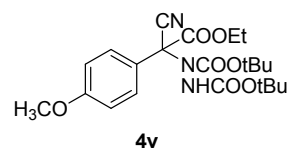

Chiralpak OD-H column, 15% *i*PrOH/hexane; 0.8 mL/min, 254 nm;

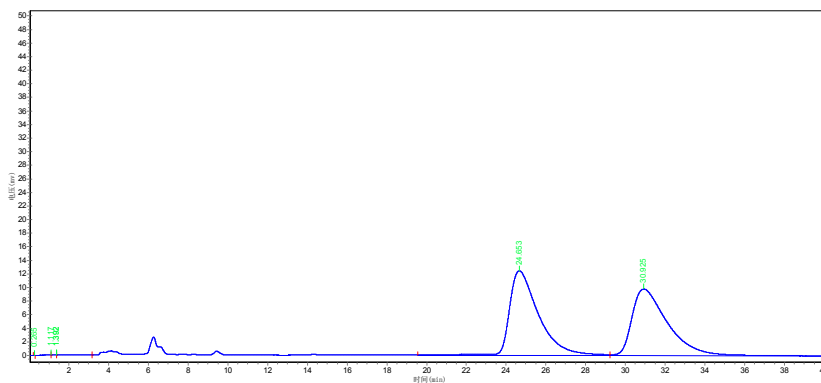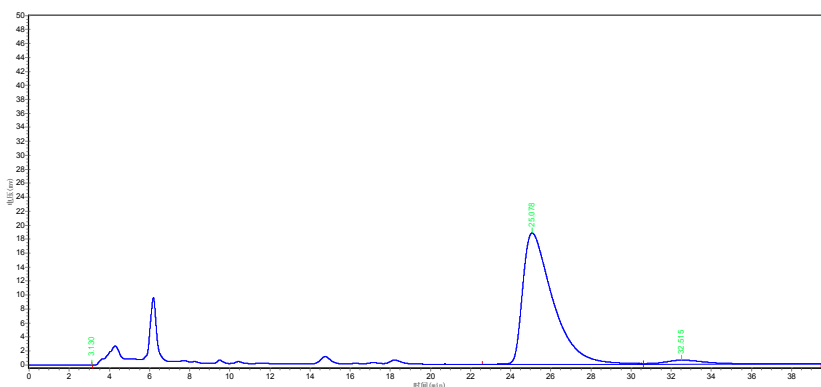

| Peak   | Ret. Time | Height    | Area        | Area (%) |
|--------|-----------|-----------|-------------|----------|
| 1      | 25.078    | 18820.006 | 1970695.500 | 95.2888  |
| 2      | 32.515    | 595.434   | 97450.000   | 4.71125  |
| Totals |           |           |             | 100      |

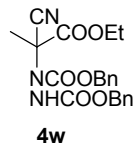

Chiralpak OD-H column, 15% *i*PrOH/hexane; 0.8 mL/min, 254 nm;

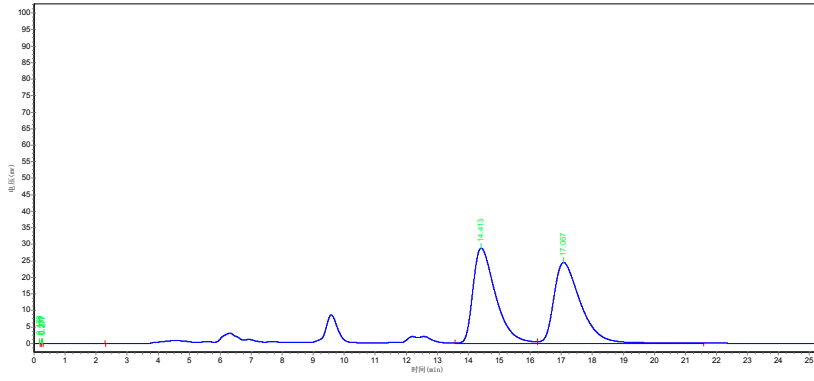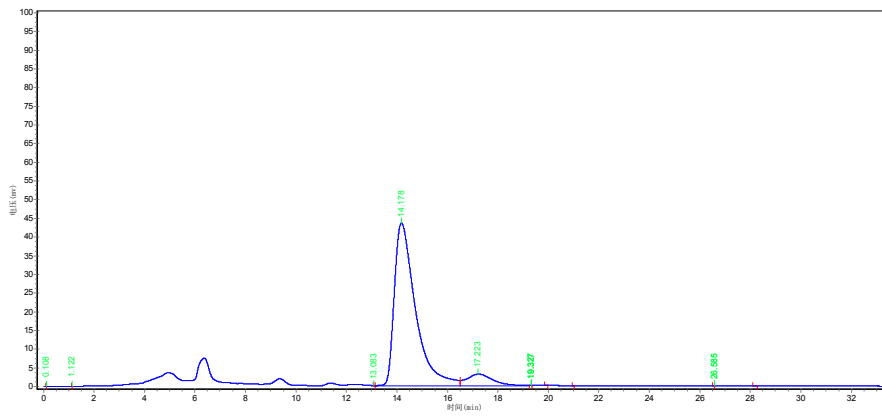

| Peak   | Ret. Time | Height    | Area        | Area (%) |
|--------|-----------|-----------|-------------|----------|
| 1      | 14.178    | 43580.777 | 2525939.000 | 96.0117  |
| 2      | 17.223    | 2062.153  | 108321.703  | 3.9883   |
| Totals |           |           |             | 100      |



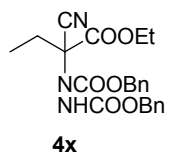

Chiralpak AS-H column, 20% *i*PrOH/hexane; 0.8 mL/min, 254 nm;

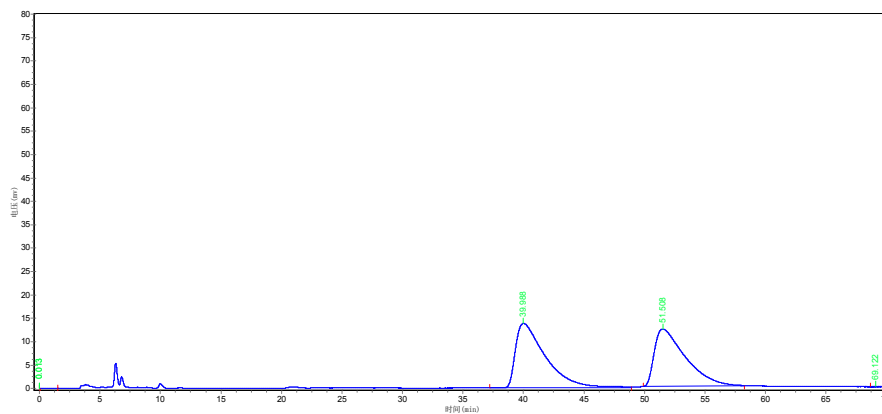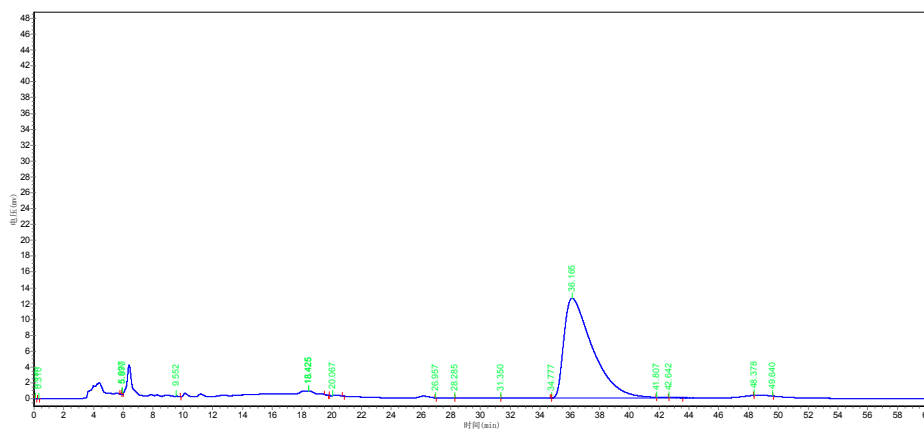

| Peak   | Ret. Time | Height    | Area        | Area (%) |
|--------|-----------|-----------|-------------|----------|
| 1      | 36.165    | 12598.615 | 1682796.125 | 99.9827  |
| 2      | 48.025    | 43.251    | 290.126     | 0.0173   |
| Totals |           |           |             | 100      |
